# Supplementary material for: Molecular mechanism of the transformation of oxidized lignin to N-substituted aromatics
Source: Royal Society of Chemistry journal article supplement (doi:10.1039/d3ob01398g), 2023-01-01
Supplement: d3ob01398g1.pdf [file d3ob01398g1.pdf]

*Electronic Supplementary Information (ESI)*

**Molecular mechanism of oxidized lignin compound to N-substituted aromatics**

Xueli Mu,<sup>a</sup> Shijie Sun, Zhihao Li, Lingli Han,<sup>\*,a</sup> Kang Lv,<sup>\*,a</sup> and Tao Liu<sup>\*,a,b</sup>

<sup>a</sup>School of Chemistry, Chemical Engineering and Materials, Jining University, Qufu  
273155, Shandong, China

<sup>b</sup>School of Chemistry and Chemical Engineering, Qufu Normal University, Qufu  
273165, Shandong, China

E-mail: hll\_2002@sina.com

E-mail: lvkangshan@126.com

E-mail: liutao\_2005@126.com

**Table of Contents**

|                                                                                                     |    |
|-----------------------------------------------------------------------------------------------------|----|
| 1. The Gibbs free diagram for the hydroxy addition process of <b>Z-Int7</b> .                       | 01 |
| 2. The cartesian coordinates of optimized reactants, intermediates, transition states and products. | 02 |

1. The Gibbs free diagram for the hydroxy addition process of **Z-Int7**.

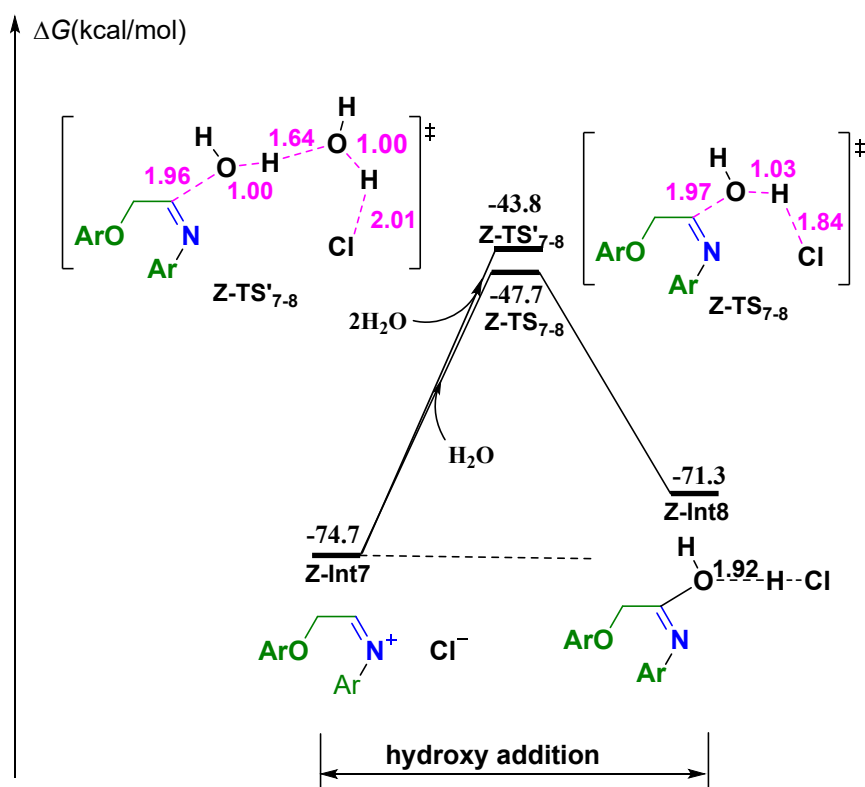

**Fig. S1** The Gibbs free diagram for the hydroxy addition process of **Z-Int7**. Bond distance are given

in

angstroms

(Å).

## 2. The cartesian coordinates of optimized reactants, intermediates, transition states and products.

### Lignin

|   |             |             |             |
|---|-------------|-------------|-------------|
| C | 1.38099200  | -0.94917900 | -1.27522400 |
| C | 0.43743900  | 0.06934400  | -1.33099600 |
| C | 0.61461800  | 1.22122000  | -0.56009900 |
| C | 1.75339900  | 1.34695600  | 0.24182600  |
| C | 2.69593200  | 0.33675900  | 0.29245700  |
| C | 2.49867400  | -0.83432000 | -0.45864800 |
| H | 1.26359600  | -1.85657400 | -1.85547400 |
| H | -0.43852600 | -0.05383400 | -1.95421700 |
| H | 1.90609300  | 2.24646600  | 0.82651100  |
| C | -0.33929000 | 2.37007600  | -0.56429500 |
| O | -0.06621300 | 3.42324500  | -0.03657500 |
| O | 3.41037800  | -1.85016900 | -0.42674700 |
| C | 3.48412600  | -2.53668200 | 0.82378500  |
| H | 4.24421000  | -3.30624900 | 0.70375100  |
| H | 3.76316500  | -1.85480700 | 1.62910900  |
| H | 2.52097700  | -3.00372600 | 1.04904000  |
| O | 3.79842100  | 0.47476200  | 1.09289800  |
| C | 5.01373700  | 0.66559800  | 0.37045800  |
| H | 4.95421100  | 1.57702000  | -0.23147900 |
| H | 5.79990900  | 0.77202100  | 1.11576500  |
| H | 5.22318900  | -0.19124700 | -0.27450100 |
| C | -1.68357000 | 2.26692600  | -1.29523500 |
| H | -2.33067800 | 3.05294000  | -0.89621400 |
| O | -2.29757600 | 1.00030200  | -1.25621500 |
| C | -2.54459600 | 0.45808200  | -0.02981300 |
| C | -2.73835000 | -0.93827100 | -0.01949400 |
| C | -2.60822700 | 1.17698900  | 1.15248400  |
| C | -3.01768500 | -1.57813800 | 1.17938900  |
| C | -2.88370400 | 0.52138600  | 2.35587200  |
| C | -3.09178200 | -0.84453300 | 2.36720700  |
| H | -3.17203500 | -2.64834200 | 1.20405900  |
| H | -2.92938600 | 1.09305800  | 3.27408300  |
| H | -3.30609000 | -1.35886700 | 3.29565400  |
| H | -1.50895400 | 2.47390500  | -2.35421700 |
| O | -2.62039600 | -1.55213400 | -1.22351800 |
| C | -2.78432400 | -2.95397400 | -1.25529700 |
| H | -2.64502500 | -3.24940300 | -2.29289500 |
| H | -2.03759300 | -3.45323200 | -0.62907800 |

|   |             |             |             |
|---|-------------|-------------|-------------|
| H | -3.78766500 | -3.24331900 | -0.92716300 |
| H | -2.44065400 | 2.24668900  | 1.15226500  |

## NH<sub>2</sub>OH

|   |             |             |             |
|---|-------------|-------------|-------------|
| N | 0.67799000  | -0.00002300 | 0.15175800  |
| H | 1.04424300  | -0.81338500 | -0.33597000 |
| H | 1.04424500  | 0.81348000  | -0.33573200 |
| O | -0.71397300 | 0.00002700  | -0.13988400 |
| H | -1.12263100 | -0.00014700 | 0.72846900  |

## Int1

|   |             |             |             |
|---|-------------|-------------|-------------|
| C | 1.69341500  | 1.77315300  | -0.82547000 |
| C | 0.75807700  | 0.75969700  | -1.01655100 |
| C | 1.11613500  | -0.55654400 | -0.74467500 |
| C | 2.39612800  | -0.84837800 | -0.25418800 |
| C | 3.30896100  | 0.16565800  | -0.01577100 |
| C | 2.95675000  | 1.49618500  | -0.32899500 |
| H | 1.45262400  | 2.80746400  | -1.03960100 |
| H | -0.23302400 | 1.00458700  | -1.37055300 |
| H | 2.63830700  | -1.88106100 | -0.04416400 |
| C | 0.21025900  | -1.71762700 | -0.96511800 |
| O | 0.65115300  | -2.84203800 | -1.10336700 |
| O | 3.81195900  | 2.52812200  | -0.09084700 |
| C | 5.00126600  | 2.52891600  | -0.87766000 |
| H | 5.53529100  | 3.44046000  | -0.61665700 |
| H | 5.62004000  | 1.65936500  | -0.65469100 |
| H | 4.74597900  | 2.54600800  | -1.94160500 |
| O | 4.53839600  | -0.02124800 | 0.52527400  |
| C | 4.86767500  | -1.33242200 | 0.94882300  |
| H | 4.91570800  | -2.01943300 | 0.09874900  |
| H | 5.84842700  | -1.25800200 | 1.41293000  |
| H | 4.14002100  | -1.70425000 | 1.67643400  |
| C | -1.29374200 | -1.53117900 | -1.09398700 |
| H | -1.53226500 | -1.38018000 | -2.15740900 |
| O | -1.73481300 | -0.43719100 | -0.32850300 |
| C | -3.06340000 | -0.16271700 | -0.32355800 |
| C | -3.43182000 | 0.98654600  | 0.41120000  |
| C | -4.03578400 | -0.90914400 | -0.96939300 |
| C | -4.76769100 | 1.34892100  | 0.48648100  |
| C | -5.38076500 | -0.53212900 | -0.88842600 |
| C | -5.74337300 | 0.58653300  | -0.16518000 |
| H | -5.06352700 | 2.22518400  | 1.04759700  |
| H | -6.13048000 | -1.12519200 | -1.39672400 |
| H | -6.78237400 | 0.88369200  | -0.09715700 |

|   |             |             |             |
|---|-------------|-------------|-------------|
| H | -1.74724300 | -2.46722500 | -0.75766500 |
| O | -2.40669600 | 1.65541000  | 0.99253600  |
| C | -2.72257400 | 2.81622300  | 1.73114200  |
| H | -1.77591000 | 3.20143400  | 2.10336400  |
| H | -3.20004600 | 3.57055300  | 1.09742900  |
| H | -3.37838000 | 2.58168100  | 2.57580100  |
| H | -3.76185400 | -1.78824600 | -1.53725800 |
| N | -0.01662200 | -2.10748800 | 1.70926500  |
| H | -0.65772300 | -2.36759300 | 2.45398000  |
| H | 0.43666900  | -1.24258400 | 1.99722100  |
| O | 0.99620000  | -3.09910100 | 1.71993700  |
| H | 0.97943000  | -3.43603400 | 0.81282100  |

### TS'1-2

|   |             |             |             |
|---|-------------|-------------|-------------|
| C | 1.80223500  | -1.53770900 | -0.90775500 |
| C | 0.87796100  | -0.49593000 | -0.87338100 |
| C | 1.23623500  | 0.71005200  | -0.27576700 |
| C | 2.50929000  | 0.87116800  | 0.27279500  |
| C | 3.42725500  | -0.17219300 | 0.24109500  |
| C | 3.06466800  | -1.39328300 | -0.35557400 |
| H | 1.56038700  | -2.48773300 | -1.36968000 |
| H | -0.11634000 | -0.64117400 | -1.28017400 |
| H | 2.74426400  | 1.83639400  | 0.70192900  |
| C | 0.30056400  | 1.91541200  | -0.19831600 |
| O | 0.89712800  | 3.08871400  | 0.12964500  |
| O | 3.95949800  | -2.42098500 | -0.44952500 |
| C | 4.26346300  | -3.05402600 | 0.78875400  |
| H | 4.97214200  | -3.84848600 | 0.56138800  |
| H | 4.71322000  | -2.34866200 | 1.48949700  |
| H | 3.35611100  | -3.48544400 | 1.22345000  |
| O | 4.68860500  | -0.09861800 | 0.73771600  |
| C | 5.09594200  | 1.13428200  | 1.29892600  |
| H | 4.48245100  | 1.39668800  | 2.16600400  |
| H | 6.12849300  | 0.99427800  | 1.61090100  |
| H | 5.04154800  | 1.93904500  | 0.56013900  |
| C | -0.98260800 | 1.64997100  | 0.57227600  |
| H | -0.70197400 | 1.38267400  | 1.59713900  |
| O | -1.67582400 | 0.59747400  | -0.06078000 |
| C | -2.80417300 | 0.12681100  | 0.52398400  |
| C | -3.38450700 | -0.99559000 | -0.10419200 |
| C | -3.39166200 | 0.66456900  | 1.65725800  |
| C | -4.54282800 | -1.54789900 | 0.42045600  |
| C | -4.55949700 | 0.09920200  | 2.17897100  |
| C | -5.13036600 | -0.99809700 | 1.56501700  |

|   |             |             |             |
|---|-------------|-------------|-------------|
| H | -4.99889600 | -2.40876500 | -0.04933800 |
| H | -5.00832400 | 0.52884400  | 3.06560300  |
| H | -6.03414700 | -1.44190000 | 1.96325700  |
| H | -1.58807000 | 2.56090900  | 0.59558500  |
| O | -2.72851700 | -1.45021800 | -1.20288900 |
| C | -3.27679400 | -2.57031400 | -1.86533000 |
| H | -2.61965200 | -2.77412900 | -2.70800600 |
| H | -3.30568800 | -3.44420300 | -1.20683500 |
| H | -4.28523700 | -2.35687100 | -2.23356500 |
| H | -2.94978100 | 1.52413100  | 2.14342400  |
| N | 0.01466400  | 2.32644000  | -1.67285500 |
| H | 0.07114500  | 1.61463300  | -2.40186400 |
| H | 0.84779200  | 3.07993900  | -1.28463600 |
| O | -1.18591200 | 3.01396400  | -1.87107100 |
| H | -1.08298200 | 3.81352000  | -1.33430700 |

### TS<sub>1-2</sub>

|   |             |             |             |
|---|-------------|-------------|-------------|
| C | -2.24500000 | -0.78122100 | -1.48063500 |
| C | -0.87676800 | -0.53187900 | -1.42622100 |
| C | -0.16578800 | -0.80444500 | -0.25488900 |
| C | -0.83168700 | -1.34389100 | 0.84494900  |
| C | -2.19191100 | -1.60387300 | 0.78788400  |
| C | -2.91213100 | -1.30142200 | -0.37938200 |
| H | -2.82212200 | -0.55219300 | -2.36898900 |
| H | -0.39222500 | -0.05227100 | -2.26917000 |
| H | -0.28411600 | -1.54486400 | 1.75829700  |
| C | 1.31896700  | -0.55383900 | -0.12342900 |
| O | 1.85569700  | -0.76740200 | 0.99763700  |
| O | -4.25650600 | -1.53479500 | -0.46625800 |
| C | -5.05624900 | -0.72918600 | 0.39930700  |
| H | -6.09175000 | -0.98277600 | 0.18004800  |
| H | -4.83131700 | -0.93345500 | 1.44751800  |
| H | -4.88560600 | 0.33051700  | 0.18733900  |
| O | -2.82415800 | -2.12179900 | 1.88596600  |
| C | -3.25988700 | -3.46965000 | 1.72171700  |
| H | -2.40298900 | -4.12053300 | 1.52409000  |
| H | -3.72643300 | -3.75827900 | 2.66186500  |
| H | -3.98168600 | -3.55182000 | 0.90555800  |
| C | 1.90123100  | 0.56534800  | -1.02618600 |
| H | 2.83053900  | 0.91529900  | -0.56896600 |
| O | 0.99449000  | 1.63000100  | -1.23908400 |
| C | 0.38965700  | 2.19136800  | -0.15010900 |
| C | -0.91346500 | 2.68097000  | -0.36409600 |
| C | 0.97367700  | 2.29111600  | 1.10118900  |

|   |             |             |             |
|---|-------------|-------------|-------------|
| C | -1.60550800 | 3.25883500  | 0.69230900  |
| C | 0.27231800  | 2.87726700  | 2.15626000  |
| C | -1.00896100 | 3.35622900  | 1.95174200  |
| H | -2.61007200 | 3.63343700  | 0.54924500  |
| H | 0.73562300  | 2.94452500  | 3.13240900  |
| H | -1.56172000 | 3.80701600  | 2.76676300  |
| H | 2.12921100  | 0.19211100  | -2.02549000 |
| O | -1.40029300 | 2.53013300  | -1.62241300 |
| C | -2.75709400 | 2.85099900  | -1.83138600 |
| H | -2.96667400 | 2.61621900  | -2.87325300 |
| H | -3.40391600 | 2.25016100  | -1.18235700 |
| H | -2.94974500 | 3.91419500  | -1.65644800 |
| H | 1.96524800  | 1.88911800  | 1.26831200  |
| C | 5.02526000  | -0.60489100 | 0.37577500  |
| O | 4.58094200  | -1.14903800 | -0.62249400 |
| C | 6.49183600  | -0.33534200 | 0.57228000  |
| H | 7.04762500  | -0.63672500 | -0.31144700 |
| H | 6.64287300  | 0.72514200  | 0.77749500  |
| H | 6.84060100  | -0.89011700 | 1.44499700  |
| O | 4.28328100  | -0.19608800 | 1.37580500  |
| H | 3.29053800  | -0.43039800 | 1.22063900  |
| N | 1.93681200  | -2.07414400 | -1.10121500 |
| H | 1.78246800  | -2.82814400 | -0.42894200 |
| H | 2.94798200  | -1.91286800 | -1.19172700 |
| O | 1.43503000  | -2.44078100 | -2.34985500 |
| H | 0.50113400  | -2.18109200 | -2.31618900 |

## Z-Int2

|   |             |             |             |
|---|-------------|-------------|-------------|
| C | -1.83512400 | 0.98521300  | -0.50217200 |
| C | -0.70590100 | 0.18779100  | -0.42410300 |
| C | -0.45435000 | -0.57755600 | 0.71515600  |
| C | -1.33405100 | -0.49758900 | 1.78668900  |
| C | -2.46209200 | 0.31647400  | 1.72988200  |
| C | -2.73069700 | 1.05388400  | 0.57997100  |
| H | -0.03449000 | 0.17243700  | -1.27473400 |
| H | -1.16503600 | -1.10520200 | 2.66877900  |
| C | 0.72972700  | -1.52659100 | 0.80712800  |
| O | 0.18179300  | -2.79048200 | 1.24563400  |
| O | -3.82107000 | 1.84257200  | 0.40380900  |
| C | -4.78800700 | 1.86199700  | 1.43435800  |
| H | -5.58469200 | 2.51546000  | 1.08606500  |
| H | -5.18946800 | 0.86009400  | 1.61473600  |
| H | -4.36972500 | 2.26139300  | 2.36358700  |
| C | 1.76412600  | -1.11791900 | 1.88981600  |

|   |             |             |             |
|---|-------------|-------------|-------------|
| H | 1.23974500  | -0.63928400 | 2.72240800  |
| O | 2.82625000  | -0.31000300 | 1.41446500  |
| C | 2.51244300  | 0.84267700  | 0.74853700  |
| C | 3.09453400  | 1.00829300  | -0.51274000 |
| C | 1.69063100  | 1.83099400  | 1.27177100  |
| C | 2.83673100  | 2.15327300  | -1.24987700 |
| C | 1.43224100  | 2.97848600  | 0.52766600  |
| C | 1.99909300  | 3.13893400  | -0.73169800 |
| H | 3.28525800  | 2.24882800  | -2.23184000 |
| H | 0.78122100  | 3.74297900  | 0.93481200  |
| H | 1.79340400  | 4.02991600  | -1.31287700 |
| H | 2.25440500  | -2.01808200 | 2.25782000  |
| O | 3.89884700  | 0.01569400  | -1.02092900 |
| C | 5.21896600  | 0.04012700  | -0.47830900 |
| H | 5.76835300  | -0.76807000 | -0.95962200 |
| H | 5.70305300  | 0.99514000  | -0.70141800 |
| H | 5.19036100  | -0.11909900 | 0.60278200  |
| H | 1.23541300  | 1.68949000  | 2.24538800  |
| C | -2.18572000 | -2.63492100 | -1.28312800 |
| O | -2.36877900 | -2.94582900 | -0.00081400 |
| C | -3.44988600 | -2.18851800 | -1.95735800 |
| H | -3.35193600 | -2.31010500 | -3.03326900 |
| H | -4.31049000 | -2.73381500 | -1.57315600 |
| H | -3.58359300 | -1.12600500 | -1.73273100 |
| O | -1.10594100 | -2.67980600 | -1.82425300 |
| H | 0.87865900  | -3.44784900 | 1.11621500  |
| N | 1.37094300  | -1.62363400 | -0.47486400 |
| H | 0.71797800  | -2.05237000 | -1.13278200 |
| H | -1.49403200 | -3.06595000 | 0.42383700  |
| O | 2.46189300  | -2.52080000 | -0.37139000 |
| H | 3.21018700  | -1.93669100 | -0.55863500 |
| H | -3.13887700 | 0.34347100  | 2.57298000  |
| O | -2.10688700 | 1.65049300  | -1.66472100 |
| C | -1.92140600 | 3.06011200  | -1.59311100 |
| H | -2.16590200 | 3.45234000  | -2.57889200 |
| H | -2.58467600 | 3.50247700  | -0.84660700 |
| H | -0.87812500 | 3.28826500  | -1.35408600 |

### **E-Int2**

|   |             |            |             |
|---|-------------|------------|-------------|
| C | -1.69877600 | 0.80244400 | 1.97081500  |
| C | -0.40045200 | 0.37719600 | 1.70457900  |
| C | 0.15826800  | 0.60016100 | 0.45062900  |
| C | -0.58712500 | 1.26753100 | -0.52390600 |
| C | -1.88811700 | 1.66935700 | -0.27076900 |



|   |             |             |             |
|---|-------------|-------------|-------------|
| C | -2.45511600 | 1.42557000  | 0.98817300  |
| H | -2.15141900 | 0.65068700  | 2.94433400  |
| H | 0.17600600  | -0.14130400 | 2.45914700  |
| H | -0.17666600 | 1.46646700  | -1.50837400 |
| C | 1.54668800  | 0.09748100  | 0.09062000  |
| O | 2.30883200  | 1.18980600  | -0.47362100 |
| O | -3.73565000 | 1.82687700  | 1.26247700  |
| C | -4.73038700 | 1.04554000  | 0.60437800  |
| H | -5.68935200 | 1.50368100  | 0.84137700  |
| H | -4.56989800 | 1.04159000  | -0.47634700 |
| H | -4.70845800 | 0.01783800  | 0.98082100  |
| O | -2.61542100 | 2.27839700  | -1.25999900 |
| C | -2.83412300 | 3.66938900  | -1.03726500 |
| H | -1.87865400 | 4.20280500  | -1.01804200 |
| H | -3.43302900 | 4.02541200  | -1.87393100 |
| H | -3.36830300 | 3.83512000  | -0.09885000 |
| C | 1.51898300  | -0.92786400 | -1.05692500 |
| H | 1.21222000  | -0.39619100 | -1.96116600 |
| O | 0.70528600  | -2.04773400 | -0.80198500 |
| C | -0.63446100 | -1.91754000 | -1.07699300 |
| C | -1.53981900 | -2.20517800 | -0.04090800 |
| C | -1.10072200 | -1.55281500 | -2.32828000 |
| C | -2.90520000 | -2.07864500 | -0.28329300 |
| C | -2.46786200 | -1.41255500 | -2.56089600 |
| C | -3.36334100 | -1.67139300 | -1.53646500 |
| H | -3.61799200 | -2.28790000 | 0.50330600  |
| H | -2.82094100 | -1.10621500 | -3.53719000 |
| H | -4.42894000 | -1.56787400 | -1.70375300 |
| H | 2.53233400  | -1.30810300 | -1.21585700 |
| O | -0.99429900 | -2.57991400 | 1.13653000  |
| C | -1.87155300 | -2.80813400 | 2.21702400  |
| H | -1.24056700 | -3.05583800 | 3.06794800  |
| H | -2.45797700 | -1.91109100 | 2.44366500  |
| H | -2.54757700 | -3.64414000 | 2.00901000  |
| H | -0.38758400 | -1.36573900 | -3.12307100 |
| C | 5.56500200  | 0.45001200  | -0.20805100 |
| O | 4.83134100  | 0.69589100  | -1.28389300 |
| C | 7.00096100  | 0.16288300  | -0.53472000 |
| H | 7.54360800  | -0.07833800 | 0.37485000  |
| H | 7.05466900  | -0.66359100 | -1.24438400 |
| H | 7.43953900  | 1.03830500  | -1.01633900 |
| O | 5.11327600  | 0.45831600  | 0.91762900  |
| H | 3.90401400  | 0.89953300  | -1.00672900 |
| N | 2.19647600  | -0.49387400 | 1.23382000  |

|   |            |             |            |
|---|------------|-------------|------------|
| H | 3.03340800 | -0.99580800 | 0.94705200 |
| H | 2.22491800 | 1.93704900  | 0.13132600 |
| O | 2.58985400 | 0.50615100  | 2.14941200 |
| H | 3.47847300 | 0.77780300  | 1.86555800 |

### Z-TS<sub>2-3</sub>

|   |             |             |             |
|---|-------------|-------------|-------------|
| C | 1.88521800  | -1.00271200 | -0.62084500 |
| C | 0.75861400  | -0.20859800 | -0.51437800 |
| C | 0.46801300  | 0.45828100  | 0.67918300  |
| C | 1.31484400  | 0.30163600  | 1.77052700  |
| C | 2.45111600  | -0.49217400 | 1.67365500  |
| C | 2.75232500  | -1.14365400 | 0.47877100  |
| H | 0.10990200  | -0.12682900 | -1.37848700 |
| H | 1.11964900  | 0.84439800  | 2.68704000  |
| C | -0.77059400 | 1.27978200  | 0.79154500  |
| O | 0.02765900  | 2.81394900  | 1.71407500  |
| O | 3.84641800  | -1.91462200 | 0.28002600  |
| C | 4.79786300  | -1.99118400 | 1.32421400  |
| H | 5.60722300  | -2.61159300 | 0.94655500  |
| H | 5.18358000  | -0.99878300 | 1.57493600  |
| H | 4.36862800  | -2.45563300 | 2.21730600  |
| C | -1.75208500 | 0.98973900  | 1.92081900  |
| H | -1.20680900 | 0.56190500  | 2.76405400  |
| O | -2.79986700 | 0.12726000  | 1.48836200  |
| C | -2.43047000 | -0.99302400 | 0.78737000  |
| C | -2.90111700 | -1.10386800 | -0.52323700 |
| C | -1.63071500 | -1.99184800 | 1.32727600  |
| C | -2.56963800 | -2.21167800 | -1.29069600 |
| C | -1.29352600 | -3.09738800 | 0.55436200  |
| C | -1.76156200 | -3.20787900 | -0.75158500 |
| H | -2.93908700 | -2.26746500 | -2.30786800 |
| H | -0.66046000 | -3.86998800 | 0.97358600  |
| H | -1.49912300 | -4.06986700 | -1.35319100 |
| H | -2.24883000 | 1.90499300  | 2.22943700  |
| O | -3.67454200 | -0.09474600 | -1.05428600 |
| C | -5.04550600 | -0.17534900 | -0.65212900 |
| H | -5.56235600 | 0.65005200  | -1.13955600 |
| H | -5.47558200 | -1.12437800 | -0.98207700 |
| H | -5.12753100 | -0.08184700 | 0.43354500  |
| H | -1.26042200 | -1.88700100 | 2.34069300  |
| C | 1.72158100  | 3.06394800  | -1.13067000 |
| O | 1.82128100  | 3.22730900  | 0.12317900  |
| C | 2.97791800  | 3.29315800  | -1.94252800 |
| H | 2.72281500  | 3.70081300  | -2.91934300 |

|   |             |             |             |
|---|-------------|-------------|-------------|
| H | 3.66907900  | 3.94392100  | -1.41094500 |
| H | 3.45513500  | 2.32153800  | -2.09629300 |
| O | 0.69179200  | 2.70309100  | -1.74202200 |
| H | -0.60173700 | 3.53993300  | 1.63536400  |
| N | -1.25587400 | 1.72850600  | -0.34652700 |
| H | -0.54064600 | 2.13970300  | -1.04346300 |
| H | 0.83113900  | 3.02360300  | 0.98232300  |
| O | -2.47793700 | 2.38294000  | -0.29679100 |
| H | -3.09596800 | 1.71028800  | -0.63143200 |
| H | 3.11197900  | -0.57318700 | 2.52562100  |
| O | 2.17467900  | -1.59624500 | -1.81493500 |
| C | 2.02578900  | -3.01150400 | -1.82554700 |
| H | 2.26253200  | -3.33620100 | -2.83729300 |
| H | 2.71098300  | -3.48294200 | -1.11828800 |
| H | 0.99276600  | -3.28057800 | -1.58402500 |

### E-TS<sub>2-3</sub>

|   |             |             |             |
|---|-------------|-------------|-------------|
| C | 1.89558200  | -0.64316700 | 2.01906400  |
| C | 0.54940800  | -0.33354400 | 1.86489300  |
| C | -0.10618000 | -0.63997300 | 0.67497000  |
| C | 0.60889300  | -1.26152600 | -0.35176900 |
| C | 1.94784800  | -1.57793400 | -0.20227600 |
| C | 2.60566600  | -1.25104400 | 0.99288000  |
| H | 2.42218100  | -0.41245400 | 2.93779000  |
| H | 0.02089000  | 0.17300600  | 2.65864400  |
| H | 0.14970900  | -1.49450500 | -1.30584300 |
| C | -1.50054000 | -0.18374900 | 0.41579300  |
| O | -2.31251600 | -1.79015100 | -0.22294600 |
| O | 3.92746500  | -1.54821000 | 1.16574900  |
| C | 4.80770500  | -0.74800700 | 0.37613000  |
| H | 5.80980900  | -1.13886600 | 0.54317200  |
| H | 4.54799400  | -0.81098400 | -0.68297700 |
| H | 4.75759900  | 0.29456900  | 0.70521900  |
| O | 2.61879800  | -2.16999800 | -1.23670000 |
| C | 2.97602200  | -3.53032200 | -0.98961100 |
| H | 2.07598900  | -4.13389000 | -0.83920400 |
| H | 3.50327600  | -3.87490200 | -1.87730900 |
| H | 3.62464800  | -3.61019200 | -0.11465900 |
| C | -1.73632800 | 0.65012000  | -0.84444900 |
| H | -1.45674500 | 0.06465000  | -1.72065800 |
| O | -1.01167400 | 1.86322000  | -0.77478600 |
| C | 0.31073300  | 1.81271400  | -1.13919800 |
| C | 1.26497100  | 2.22051200  | -0.19160500 |
| C | 0.71027400  | 1.40464500  | -2.40053500 |

|   |             |             |             |
|---|-------------|-------------|-------------|
| C | 2.61493700  | 2.17743000  | -0.53065100 |
| C | 2.06334900  | 1.34683100  | -2.72924200 |
| C | 3.00890600  | 1.73016600  | -1.79209200 |
| H | 3.36649900  | 2.48801100  | 0.18289500  |
| H | 2.36746800  | 1.01091100  | -3.71221700 |
| H | 4.06423200  | 1.69563900  | -2.03572000 |
| H | -2.79226000 | 0.91019200  | -0.91252400 |
| O | 0.77987200  | 2.61705300  | 1.00778200  |
| C | 1.71715800  | 3.00237400  | 1.98970600  |
| H | 1.13708300  | 3.26958900  | 2.87060700  |
| H | 2.39529700  | 2.17668300  | 2.23220800  |
| H | 2.29953000  | 3.86992200  | 1.66325900  |
| H | -0.04537100 | 1.12446700  | -3.12595400 |
| C | -5.23135700 | -0.35633300 | -0.37284700 |
| O | -4.53780600 | -1.22025500 | -0.99575200 |
| O | -4.80041100 | 0.40132900  | 0.52130700  |
| H | -3.33582700 | -1.53649900 | -0.57194700 |
| N | -2.32805800 | 0.14821800  | 1.38985300  |
| H | -3.33765300 | 0.32178800  | 1.08934000  |
| H | -1.87056100 | -2.37368900 | -0.84652600 |
| O | -2.24635200 | -0.59771900 | 2.56369900  |
| H | -2.50122400 | 0.02142100  | 3.25633700  |
| C | -6.69107900 | -0.26957900 | -0.75876000 |
| H | -6.80280000 | -0.39109400 | -1.83550000 |
| H | -7.21951700 | -1.09373700 | -0.27361400 |
| H | -7.11866300 | 0.67259700  | -0.42300900 |

### Z-Int3

|   |             |             |             |
|---|-------------|-------------|-------------|
| C | 0.13322000  | 1.32065600  | 1.72099100  |
| C | 0.51899000  | 0.01295200  | 1.45071400  |
| C | 0.50977400  | -0.46413800 | 0.14117300  |
| C | 0.13955700  | 0.38934000  | -0.90111000 |
| C | -0.22977800 | 1.69640400  | -0.63568300 |
| C | -0.25665900 | 2.16195300  | 0.68664500  |
| H | 0.11286100  | 1.70636700  | 2.73399000  |
| H | 0.79640200  | -0.65485400 | 2.25759900  |
| H | 0.16234000  | 0.06045400  | -1.93363400 |
| C | 0.88503300  | -1.87228000 | -0.14311700 |
| O | 2.16174800  | -1.11368500 | -2.66692800 |
| O | -0.64242300 | 3.44481300  | 0.96383300  |
| C | -2.03710700 | 3.67080900  | 0.76259000  |
| H | -2.21564000 | 4.72028900  | 0.99031500  |
| H | -2.32047700 | 3.45483700  | -0.26985700 |
| H | -2.61913900 | 3.04088600  | 1.44350500  |

|   |             |             |             |
|---|-------------|-------------|-------------|
| O | -0.57471100 | 2.53200600  | -1.66441900 |
| C | 0.46281600  | 3.45356700  | -1.99554700 |
| H | 1.36139100  | 2.91147000  | -2.30527200 |
| H | 0.09148500  | 4.05573300  | -2.82306400 |
| H | 0.69282300  | 4.09650000  | -1.14143100 |
| C | 0.03703100  | -2.69432700 | -1.09051100 |
| H | 0.00082300  | -2.17993400 | -2.05429800 |
| O | -1.27046700 | -2.91055200 | -0.56474500 |
| C | -2.11148500 | -1.82661900 | -0.58426200 |
| C | -2.47420400 | -1.24257200 | 0.64143000  |
| C | -2.60206900 | -1.31469300 | -1.77291700 |
| C | -3.29928900 | -0.12088300 | 0.63969000  |
| C | -3.42341400 | -0.18855700 | -1.77219100 |
| C | -3.76211600 | 0.40576800  | -0.56700200 |
| H | -3.57696900 | 0.35587000  | 1.57031600  |
| H | -3.78870500 | 0.21684100  | -2.70723700 |
| H | -4.39581100 | 1.28479400  | -0.55218400 |
| H | 0.47467700  | -3.67799000 | -1.22780600 |
| O | -1.95243100 | -1.81806500 | 1.75075600  |
| C | -2.27662400 | -1.23914800 | 2.99614400  |
| H | -1.77002800 | -1.84121100 | 3.74780400  |
| H | -1.92068200 | -0.20456200 | 3.05424200  |
| H | -3.35617300 | -1.26695100 | 3.17571800  |
| H | -2.31502200 | -1.79587200 | -2.70145600 |
| C | 3.76218200  | 0.64741900  | 0.45356200  |
| O | 3.43288700  | 0.49908000  | -0.70262200 |
| C | 4.34452900  | 1.92034400  | 0.99783200  |
| H | 3.56560600  | 2.42814400  | 1.57170700  |
| H | 5.17096700  | 1.70195200  | 1.67327800  |
| H | 4.66617700  | 2.55822200  | 0.17883300  |
| O | 3.63036800  | -0.28974000 | 1.38135000  |
| H | 2.85438400  | -1.49535300 | -3.20896200 |
| N | 1.92793200  | -2.30072300 | 0.45386900  |
| H | 3.10115000  | -1.04971000 | 1.02744000  |
| H | 2.62213900  | -0.57704800 | -2.00185900 |
| O | 2.23825100  | -3.62383200 | 0.18012800  |
| H | 3.00178500  | -3.79999300 | 0.73582900  |

### **E-Int3**

|   |             |            |             |
|---|-------------|------------|-------------|
| C | -1.70885900 | 0.98669400 | 1.96310700  |
| C | -0.45863200 | 0.40831300 | 1.78412200  |
| C | 0.12402700  | 0.38612900 | 0.51698500  |
| C | -0.54317900 | 0.97792700 | -0.55662300 |
| C | -1.78302800 | 1.56948200 | -0.37815200 |

|   |             |             |             |
|---|-------------|-------------|-------------|
| C | -2.38277900 | 1.55397400  | 0.88804000  |
| H | -2.18779100 | 1.00578300  | 2.93531900  |
| H | 0.05995400  | -0.04832400 | 2.61758600  |
| H | -0.11480200 | 0.99491700  | -1.55160400 |
| C | 1.39886400  | -0.33871900 | 0.28990200  |
| O | 2.41108200  | 2.52382000  | 0.01811600  |
| O | -3.61325500 | 2.11838900  | 1.08152500  |
| C | -4.67990500 | 1.37966400  | 0.48793900  |
| H | -5.58909200 | 1.94872300  | 0.67410200  |
| H | -4.52053900 | 1.26058800  | -0.58616900 |
| H | -4.75890700 | 0.39523100  | 0.95993900  |
| O | -2.42624400 | 2.12946100  | -1.44961600 |
| C | -2.46508400 | 3.55469400  | -1.41185700 |
| H | -1.44898000 | 3.95939500  | -1.44215900 |
| H | -3.01100600 | 3.87140100  | -2.29896200 |
| H | -2.97805600 | 3.90605700  | -0.51347500 |
| C | 1.50894600  | -1.29794000 | -0.87540600 |
| H | 1.32378900  | -0.76044800 | -1.81243800 |
| O | 0.62943000  | -2.40658000 | -0.75480200 |
| C | -0.69781000 | -2.16272800 | -1.00671200 |
| C | -1.60454600 | -2.26930000 | 0.06166200  |
| C | -1.14667300 | -1.84179800 | -2.27582600 |
| C | -2.95519700 | -2.02222400 | -0.17134600 |
| C | -2.49692500 | -1.57960200 | -2.50199100 |
| C | -3.39250600 | -1.66784900 | -1.44821900 |
| H | -3.67101700 | -2.09522700 | 0.63643200  |
| H | -2.83849200 | -1.31124600 | -3.49338800 |
| H | -4.44545000 | -1.47010200 | -1.61093900 |
| H | 2.51626000  | -1.71091200 | -0.90008700 |
| O | -1.07129200 | -2.59185400 | 1.26232400  |
| C | -1.94940000 | -2.66296700 | 2.36537000  |
| H | -1.33133900 | -2.91251900 | 3.22525100  |
| H | -2.44373700 | -1.70023600 | 2.53466300  |
| H | -2.70349200 | -3.44325800 | 2.22107200  |
| H | -0.42614100 | -1.78626800 | -3.08461100 |
| C | 5.44244800  | 0.24417100  | -0.34937400 |
| O | 4.75732100  | 1.19610300  | -0.67309300 |
| C | 6.88546000  | 0.09761700  | -0.74483500 |
| H | 7.03087900  | -0.85928000 | -1.24733400 |
| H | 7.17788700  | 0.91952100  | -1.39244800 |
| H | 7.50018500  | 0.09102100  | 0.15692100  |
| O | 5.00912000  | -0.76221100 | 0.37895000  |
| H | 3.23939300  | 2.10295000  | -0.27692700 |
| N | 2.45234500  | -0.24423500 | 1.00525400  |

|   |            |             |             |
|---|------------|-------------|-------------|
| H | 4.04654600 | -0.62383900 | 0.64220300  |
| H | 2.54179400 | 3.46849600  | -0.08071800 |
| O | 2.44322700 | 0.67916500  | 2.03765500  |
| H | 2.17929700 | 1.52364500  | 1.62179700  |

### **Z-lignin**<sup>oxime</sup>

|   |             |             |             |
|---|-------------|-------------|-------------|
| C | -2.08147600 | -0.16966000 | -1.04503000 |
| C | -0.75837200 | -0.56317000 | -1.06130400 |
| C | -0.24362100 | -1.39545600 | -0.06075400 |
| C | -1.08965400 | -1.82222400 | 0.95622500  |
| C | -2.43123300 | -1.44425200 | 0.97621400  |
| C | -2.93719000 | -0.61350600 | -0.01855300 |
| H | -0.11375200 | -0.20184700 | -1.85453700 |
| H | -0.72193900 | -2.47485000 | 1.73976400  |
| C | 1.19159500  | -1.76430800 | -0.08894000 |
| O | -4.21988400 | -0.17997800 | -0.08639700 |
| C | -5.11974400 | -0.63630500 | 0.90234400  |
| H | -6.08361700 | -0.19563300 | 0.65777300  |
| H | -5.20333400 | -1.72725800 | 0.88466800  |
| H | -4.81135600 | -0.30886100 | 1.90027100  |
| C | 2.02128900  | -1.70782200 | 1.17882400  |
| H | 1.37297600  | -1.79823300 | 2.05443000  |
| O | 2.75861600  | -0.48575700 | 1.25308800  |
| C | 1.97102100  | 0.63856600  | 1.12993900  |
| C | 1.95541100  | 1.33816400  | -0.08248200 |
| C | 1.17671900  | 1.06020600  | 2.18932800  |
| C | 1.11736400  | 2.44266700  | -0.21530400 |
| C | 0.33775700  | 2.15845600  | 2.04673300  |
| C | 0.30446900  | 2.84543600  | 0.83713200  |
| H | 1.11220100  | 2.96135500  | -1.16692100 |
| H | -0.28451000 | 2.47466900  | 2.87477100  |
| H | -0.34811200 | 3.70199600  | 0.71582000  |
| H | 2.76673500  | -2.50064200 | 1.18717900  |
| O | 2.67475300  | 0.93934400  | -1.16848300 |
| C | 4.08711900  | 0.83677800  | -0.98919100 |
| H | 4.50550200  | 0.71511400  | -1.98726300 |
| H | 4.47570900  | 1.75758400  | -0.54346300 |
| H | 4.34233800  | -0.02112500 | -0.36871500 |
| H | 1.21640900  | 0.50234000  | 3.11847100  |
| N | 1.70055600  | -2.01413100 | -1.23072300 |
| O | 3.06562400  | -2.23096200 | -1.16254800 |
| H | 3.30459700  | -2.41718000 | -2.07426600 |
| H | -3.07079900 | -1.80464100 | 1.77035800  |
| O | -2.56241300 | 0.62879300  | -2.04363000 |

|   |             |            |             |
|---|-------------|------------|-------------|
| C | -2.77149400 | 1.97914800 | -1.64610800 |
| H | -3.11689300 | 2.51140000 | -2.53086300 |
| H | -3.52772700 | 2.04112700 | -0.86004400 |
| H | -1.83164300 | 2.41575200 | -1.29306200 |

### Z-Int4

|   |             |             |             |
|---|-------------|-------------|-------------|
| C | 1.20825000  | -2.11642400 | 0.64468000  |
| C | 0.14111800  | -1.49841800 | 0.00265900  |
| C | 0.37915200  | -0.62186400 | -1.05403100 |
| C | 1.69047300  | -0.39837000 | -1.47957100 |
| C | 2.75566300  | -1.01819400 | -0.84579900 |
| C | 2.51413300  | -1.86615000 | 0.24363200  |
| H | 1.04841600  | -2.78796000 | 1.48074200  |
| H | -0.87445300 | -1.65253800 | 0.34735400  |
| H | 1.91757200  | 0.26967300  | -2.30249800 |
| C | -0.74975600 | 0.09045700  | -1.70532400 |
| O | 3.55671500  | -2.45758600 | 0.90737500  |
| C | 4.31052800  | -1.54071200 | 1.69699500  |
| H | 5.13902800  | -2.10493600 | 2.12230900  |
| H | 4.68788100  | -0.71862600 | 1.08384100  |
| H | 3.68636000  | -1.14105500 | 2.50315800  |
| O | 4.03398500  | -0.76184300 | -1.26720000 |
| C | 4.66782800  | -1.87838200 | -1.88871100 |
| H | 4.10847000  | -2.17993000 | -2.77937900 |
| H | 5.66301700  | -1.54548500 | -2.17863100 |
| H | 4.74208200  | -2.71978700 | -1.19604900 |
| C | -0.63316200 | 1.57968000  | -1.96156100 |
| H | 0.21999000  | 1.78571200  | -2.61636600 |
| O | -0.50736100 | 2.30465200  | -0.73891400 |
| C | 0.72797200  | 2.28707100  | -0.13845100 |
| C | 0.85525200  | 1.65675700  | 1.11170000  |
| C | 1.82536000  | 2.88707800  | -0.73173500 |
| C | 2.10361600  | 1.62330200  | 1.72782300  |
| C | 3.07675400  | 2.83455200  | -0.12118300 |
| C | 3.20975900  | 2.20012500  | 1.10370200  |
| H | 2.22428200  | 1.14284700  | 2.68961900  |
| H | 3.93392900  | 3.28913600  | -0.60115900 |
| H | 4.17638300  | 2.15296700  | 1.59105900  |
| H | -1.53893200 | 1.94791100  | -2.43382000 |
| O | -0.27036900 | 1.10250300  | 1.61668400  |
| C | -0.15530500 | 0.37289600  | 2.82060800  |
| H | -1.13165700 | -0.07546200 | 2.99409100  |
| H | 0.58975300  | -0.42320200 | 2.72521800  |
| H | 0.10823700  | 1.03012700  | 3.65574200  |



|    |             |             |             |
|----|-------------|-------------|-------------|
| H  | 1.69319500  | 3.38331300  | -1.68715200 |
| N  | -1.78009000 | -0.60776900 | -1.98203900 |
| O  | -2.78958300 | 0.12521800  | -2.58700600 |
| H  | -3.51605300 | -0.50293100 | -2.63393400 |
| S  | -3.99201400 | -0.58623400 | 1.23609000  |
| O  | -2.87138400 | -1.43385800 | 1.58506100  |
| Cl | -4.86951600 | -1.39962800 | -0.52228400 |
| Cl | -3.20851200 | 1.15793700  | 0.44299500  |

### Z-TS<sub>4-5</sub>

|   |             |             |             |
|---|-------------|-------------|-------------|
| C | 1.69336200  | -1.94124800 | 1.23214000  |
| C | 0.49712900  | -1.56993800 | 0.63688400  |
| C | 0.50413200  | -0.92607400 | -0.60297500 |
| C | 1.71923800  | -0.70335200 | -1.25473400 |
| C | 2.91488000  | -1.08785400 | -0.66929100 |
| C | 2.90529400  | -1.68236600 | 0.60035800  |
| H | 1.71580600  | -2.41643700 | 2.20592700  |
| H | -0.44946600 | -1.73159800 | 1.13903300  |
| H | 1.77607100  | -0.22265000 | -2.22352700 |
| C | -0.77457800 | -0.45616600 | -1.18002700 |
| O | 4.07330400  | -2.02663100 | 1.21810600  |
| C | 4.84618700  | -0.90483000 | 1.64674400  |
| H | 5.75092600  | -1.30998200 | 2.09606100  |
| H | 5.09953100  | -0.26034600 | 0.80198600  |
| H | 4.28727600  | -0.33236900 | 2.39363200  |
| O | 4.08994700  | -0.83789900 | -1.32311000 |
| C | 4.76450000  | -2.01221100 | -1.77512600 |
| H | 4.13250600  | -2.56092200 | -2.47949700 |
| H | 5.66553600  | -1.67154100 | -2.28192800 |
| H | 5.02965100  | -2.65812900 | -0.93545100 |
| C | -0.82527100 | 0.82950000  | -1.98962100 |
| H | -0.07606400 | 0.75258100  | -2.78693900 |
| O | -0.61104600 | 2.00906200  | -1.23270600 |
| C | 0.60565200  | 2.14018100  | -0.60734800 |
| C | 0.69772500  | 1.79410700  | 0.75159200  |
| C | 1.70666300  | 2.62424400  | -1.28832100 |
| C | 1.92529800  | 1.91844400  | 1.39683900  |
| C | 2.93653100  | 2.74161600  | -0.64176600 |
| C | 3.03754500  | 2.38498100  | 0.69386800  |
| H | 2.02529200  | 1.64963400  | 2.44006500  |
| H | 3.80139100  | 3.10694600  | -1.18034100 |
| H | 3.98735200  | 2.47304900  | 1.20833300  |
| H | -1.80874000 | 0.94530500  | -2.43635300 |
| O | -0.43737800 | 1.32451700  | 1.31626200  |

|    |             |             |             |
|----|-------------|-------------|-------------|
| C  | -0.39424600 | 1.00082400  | 2.69210700  |
| H  | -1.39159500 | 0.65167300  | 2.94631700  |
| H  | 0.33272300  | 0.20498800  | 2.88517700  |
| H  | -0.14234400 | 1.88179100  | 3.29070000  |
| H  | 1.58968200  | 2.89713500  | -2.33145000 |
| N  | -1.76339500 | -1.25073800 | -0.97879600 |
| O  | -2.97993100 | -0.74363300 | -1.44225300 |
| H  | -3.53078600 | -1.54774100 | -1.53370000 |
| S  | -4.04564500 | -0.12033300 | 0.51546000  |
| O  | -2.98392300 | -0.49430000 | 1.40410300  |
| Cl | -4.92260800 | -2.32863100 | -0.00605400 |
| Cl | -3.45908000 | 1.86280900  | -0.11071000 |

### Z-Int5

|   |             |             |             |
|---|-------------|-------------|-------------|
| C | 1.87608400  | -0.10413900 | -2.25830900 |
| C | 0.67869400  | -0.63532700 | -1.79925100 |
| C | 0.03626400  | -0.03052600 | -0.72605500 |
| C | 0.57249700  | 1.11413300  | -0.12853800 |
| C | 1.77526300  | 1.63785800  | -0.58143800 |
| C | 2.45109000  | 0.99806600  | -1.64185900 |
| H | 2.41263000  | -0.55832900 | -3.08255700 |
| H | 0.27844000  | -1.53595200 | -2.24745200 |
| H | 0.05261600  | 1.56213100  | 0.70774200  |
| C | -1.16762800 | -0.65664700 | -0.14170300 |
| O | 3.64192200  | 1.43796600  | -2.12487900 |
| C | 4.66947500  | 1.75334300  | -1.18624300 |
| H | 5.61097000  | 1.49456800  | -1.67028700 |
| H | 4.65444100  | 2.81269900  | -0.93500100 |
| H | 4.54846400  | 1.16620900  | -0.27124200 |
| O | 2.36282700  | 2.74600100  | -0.07001800 |
| C | 1.72223800  | 3.37063500  | 1.03084900  |
| H | 1.66009800  | 2.68386800  | 1.88126800  |
| H | 2.34297000  | 4.22448100  | 1.29224500  |
| H | 0.71991500  | 3.71145400  | 0.75898200  |
| C | -1.17346700 | -2.16114900 | 0.10460600  |
| H | -1.79369400 | -2.39236400 | 0.97099800  |
| O | 0.12981700  | -2.68048000 | 0.23829000  |
| C | 0.94790200  | -2.02951600 | 1.12385100  |
| C | 2.31099900  | -1.95979000 | 0.77190900  |
| C | 0.49172400  | -1.40618100 | 2.27289500  |
| C | 3.17669900  | -1.22100700 | 1.56989400  |
| C | 1.37064900  | -0.67118300 | 3.07137200  |
| C | 2.70298500  | -0.57199300 | 2.71279600  |
| H | 4.22280400  | -1.14017500 | 1.30631500  |

|    |             |             |             |
|----|-------------|-------------|-------------|
| H  | 1.00042600  | -0.17987600 | 3.96238700  |
| H  | 3.39157500  | 0.00261100  | 3.32029800  |
| H  | -1.61728000 | -2.65527500 | -0.76380500 |
| O  | 2.66312100  | -2.61018600 | -0.35892800 |
| C  | 3.97850500  | -2.41768000 | -0.83642000 |
| H  | 4.04150700  | -2.97050300 | -1.77126400 |
| H  | 4.17377500  | -1.35612700 | -1.02645500 |
| H  | 4.71832700  | -2.81101800 | -0.13231000 |
| H  | -0.55731500 | -1.46139300 | 2.53941400  |
| N  | -2.13518100 | 0.12358400  | 0.15051900  |
| O  | -3.18275600 | -0.59914600 | 0.80086700  |
| H  | -2.42976700 | 2.17331300  | 0.25587600  |
| S  | -4.66944300 | -0.27741800 | 0.19875400  |
| O  | -4.75958300 | 1.12753600  | -0.12014300 |
| Cl | -2.27968400 | 3.38361900  | 0.70018800  |
| Cl | -4.37538500 | -1.30265700 | -1.66492200 |

### Z-TS<sub>5,6</sub>

|   |             |             |             |
|---|-------------|-------------|-------------|
| C | 1.57214700  | -2.04501300 | -1.44138000 |
| C | 0.30109300  | -1.78083900 | -0.97014200 |
| C | -0.04668900 | -0.44777600 | -0.75247200 |
| C | 0.79761400  | 0.61474500  | -1.11073000 |
| C | 2.05792700  | 0.34368900  | -1.60412300 |
| C | 2.46949200  | -1.01122000 | -1.72149000 |
| H | 1.92090800  | -3.05957500 | -1.58778100 |
| H | -0.39436800 | -2.57467000 | -0.72689300 |
| H | 0.44149800  | 1.62757000  | -0.97424900 |
| C | -1.28261300 | -0.14456100 | 0.07216600  |
| O | 3.68348800  | -1.38763800 | -2.15064400 |
| C | 4.84654600  | -0.61694900 | -1.82672700 |
| H | 5.66948200  | -1.32929400 | -1.82915500 |
| H | 5.01461200  | 0.16023800  | -2.56878800 |
| H | 4.74237100  | -0.16501800 | -0.83832800 |
| O | 2.93555000  | 1.28737900  | -2.01112800 |
| C | 2.53257500  | 2.64453300  | -1.89589100 |
| H | 2.32689500  | 2.89679100  | -0.85148400 |
| H | 3.36911300  | 3.23478900  | -2.26163600 |
| H | 1.64883700  | 2.84020800  | -2.50966100 |
| C | -1.48885400 | -0.20949000 | 1.56549700  |
| H | -1.84073100 | 0.77142000  | 1.89535100  |
| O | -0.33332100 | -0.65994700 | 2.21245800  |
| C | 0.78863700  | 0.12115400  | 2.09540200  |
| C | 2.00475900  | -0.56927600 | 1.92426400  |
| C | 0.76631400  | 1.50452900  | 2.11955900  |

|    |             |             |             |
|----|-------------|-------------|-------------|
| C  | 3.18034900  | 0.15942800  | 1.77475500  |
| C  | 1.95008400  | 2.22736800  | 1.95592600  |
| C  | 3.14873400  | 1.55594700  | 1.78369100  |
| H  | 4.12563100  | -0.35230600 | 1.65220000  |
| H  | 1.92134700  | 3.30988600  | 1.97774800  |
| H  | 4.07378600  | 2.10751200  | 1.66467000  |
| H  | -2.27928200 | -0.94350000 | 1.73486200  |
| O  | 1.91886400  | -1.91634400 | 1.88984800  |
| C  | 3.10484300  | -2.64087700 | 1.63522200  |
| H  | 2.81551900  | -3.68914900 | 1.61222400  |
| H  | 3.53733900  | -2.35995700 | 0.66751500  |
| H  | 3.84308500  | -2.48482700 | 2.42768900  |
| H  | -0.17047000 | 2.03229600  | 2.24852700  |
| N  | -1.91534100 | 0.07334100  | -0.94822900 |
| O  | -3.66383200 | 0.66457100  | -0.02452600 |
| H  | -2.90781300 | 2.31784400  | -0.02399600 |
| S  | -4.87545500 | -0.15576300 | -0.44951100 |
| O  | -4.97596000 | -0.24378200 | -1.89269300 |
| Cl | -2.00829300 | 3.24635800  | 0.17474700  |
| Cl | -4.06106900 | -2.21975200 | 0.19662200  |

### Z-Int6

|   |             |             |             |
|---|-------------|-------------|-------------|
| C | 2.00576400  | -0.81597500 | -2.06702800 |
| C | 0.67545100  | -1.08516200 | -1.91567100 |
| C | -0.14478900 | -0.10075600 | -1.31716300 |
| C | 0.38009500  | 1.16405300  | -0.95174600 |
| C | 1.72679700  | 1.41305800  | -1.05710200 |
| C | 2.56551800  | 0.39919600  | -1.61378400 |
| H | 2.68730300  | -1.53684500 | -2.49991500 |
| H | 0.24669000  | -2.03328900 | -2.21641000 |
| H | -0.30769100 | 1.88096600  | -0.51468200 |
| C | -1.30491500 | -0.63235500 | -0.40889000 |
| O | 3.87357800  | 0.48122500  | -1.78634000 |
| C | 4.70470300  | 1.50884600  | -1.22229300 |
| H | 5.71853100  | 1.16877400  | -1.41893000 |
| H | 4.51987300  | 2.46290900  | -1.71009400 |
| H | 4.52585400  | 1.59156900  | -0.15241000 |
| O | 2.30459400  | 2.56843500  | -0.67212400 |
| C | 1.45917500  | 3.52364400  | -0.02880300 |
| H | 0.96108500  | 3.08012600  | 0.83716400  |
| H | 2.11457900  | 4.33382700  | 0.27983400  |
| H | 0.70502600  | 3.90047500  | -0.72486600 |
| C | -1.35101300 | -1.28005900 | 0.94193600  |
| H | -1.61124900 | -0.51280500 | 1.67308700  |

|    |             |             |             |
|----|-------------|-------------|-------------|
| O  | -0.13472100 | -1.93170700 | 1.18629300  |
| C  | 0.96259600  | -1.15364000 | 1.47732900  |
| C  | 2.20340800  | -1.69254000 | 1.08495100  |
| C  | 0.90611100  | 0.07116200  | 2.12196200  |
| C  | 3.37003300  | -0.98530300 | 1.36046000  |
| C  | 2.08207000  | 0.77631200  | 2.38520500  |
| C  | 3.30574300  | 0.24794600  | 2.01330900  |
| H  | 4.33257200  | -1.38709400 | 1.07309700  |
| H  | 2.02135000  | 1.73037200  | 2.89440200  |
| H  | 4.22318600  | 0.77996200  | 2.23641500  |
| H  | -2.14414300 | -2.02831800 | 0.91049600  |
| O  | 2.15547600  | -2.87892300 | 0.43438600  |
| C  | 3.38456000  | -3.45282600 | 0.03985700  |
| H  | 3.13334500  | -4.38340800 | -0.46406200 |
| H  | 3.92566300  | -2.79519700 | -0.65010300 |
| H  | 4.01672000  | -3.66741200 | 0.90687300  |
| H  | -0.04171400 | 0.51710300  | 2.39782700  |
| N  | -1.71754600 | -0.24224800 | -1.48062200 |
| O  | -3.83702700 | 0.32936000  | 1.06674100  |
| H  | -3.11682600 | 1.13115500  | 1.08451100  |
| S  | -4.90830900 | 0.28373400  | -0.07506300 |
| O  | -4.52684300 | 1.18006100  | -1.14524100 |
| Cl | -1.80620500 | 2.23731100  | 1.36209500  |
| Cl | -4.40689500 | -1.79602200 | -0.77984500 |

### Z-TS<sub>6-7</sub>

|   |             |             |             |
|---|-------------|-------------|-------------|
| C | 0.25106300  | 1.11599400  | -1.64030600 |
| C | 0.18421500  | -0.25106100 | -1.80325300 |
| C | -0.94143300 | -0.93334200 | -1.32555800 |
| C | -2.01670600 | -0.23492300 | -0.75025600 |
| C | -1.93984100 | 1.13307300  | -0.57736600 |
| C | -0.76902900 | 1.81640200  | -0.99075900 |
| H | 1.11391900  | 1.68310300  | -1.96614600 |
| H | 0.99399400  | -0.80630200 | -2.25996600 |
| H | -2.87408800 | -0.80592200 | -0.42419000 |
| C | -0.71806000 | -2.46936200 | -0.53742200 |
| O | -0.58509800 | 3.13772600  | -0.84931100 |
| C | -1.03760300 | 3.80568200  | 0.33280100  |
| H | -0.37226100 | 4.65925500  | 0.45068300  |
| H | -2.06753100 | 4.13791900  | 0.22096800  |
| H | -0.95009900 | 3.14621800  | 1.19754300  |
| O | -2.93303800 | 1.88209700  | -0.03948600 |
| C | -4.07185800 | 1.18710700  | 0.44790400  |
| H | -3.78551900 | 0.45128700  | 1.20540100  |

|    |             |             |             |
|----|-------------|-------------|-------------|
| H  | -4.71715100 | 1.94362200  | 0.88751000  |
| H  | -4.59922100 | 0.68505400  | -0.36794400 |
| C  | 0.50066400  | -2.84645300 | 0.30288400  |
| H  | 0.23202600  | -2.87919900 | 1.35342400  |
| O  | 1.59754100  | -2.02226800 | 0.04418600  |
| C  | 1.63605300  | -0.81603400 | 0.69703700  |
| C  | 2.74586300  | -0.00916700 | 0.37535400  |
| C  | 0.65970000  | -0.34830400 | 1.56054400  |
| C  | 2.85879600  | 1.25180600  | 0.94445500  |
| C  | 0.78668600  | 0.92337100  | 2.12873400  |
| C  | 1.87561700  | 1.71763600  | 1.82172700  |
| H  | 3.70300700  | 1.88443000  | 0.70575900  |
| H  | 0.02164900  | 1.27363800  | 2.81122400  |
| H  | 1.97798100  | 2.70410000  | 2.25774500  |
| H  | 0.76214900  | -3.85037100 | -0.04106200 |
| O  | 3.61470300  | -0.54035600 | -0.51746600 |
| C  | 4.74400000  | 0.23359400  | -0.86603000 |
| H  | 5.31521800  | -0.36897500 | -1.56830200 |
| H  | 4.44714000  | 1.17199800  | -1.34610600 |
| H  | 5.35929300  | 0.45259600  | 0.01209200  |
| H  | -0.22209400 | -0.93948500 | 1.78234200  |
| N  | -1.09397100 | -2.41571700 | -1.70799400 |
| Cl | -2.27777900 | -2.87921500 | 1.01286200  |

### Z-Int7

|   |             |             |             |
|---|-------------|-------------|-------------|
| C | -2.43657000 | -2.13390800 | -0.04962200 |
| C | -1.21160400 | -1.47387500 | -0.05842700 |
| C | -1.17530600 | -0.11307000 | 0.21366800  |
| C | -2.34340400 | 0.57931100  | 0.54913900  |
| C | -3.55838700 | -0.09372300 | 0.58555800  |
| C | -3.60632900 | -1.46440300 | 0.26710900  |
| H | -2.50307700 | -3.19337300 | -0.26586500 |
| H | -0.28804300 | -1.99511700 | -0.27631200 |
| H | -2.28095400 | 1.62969400  | 0.79461400  |
| C | 0.38863100  | 1.56959700  | -0.37660800 |
| O | -4.78287800 | -2.15404100 | 0.33461800  |
| C | -5.70544500 | -1.84679500 | -0.70496600 |
| H | -6.58631400 | -2.46051400 | -0.52457000 |
| H | -5.98196800 | -0.79104600 | -0.68305600 |
| H | -5.27455900 | -2.09999500 | -1.67899300 |
| O | -4.73987300 | 0.48266700  | 0.91955000  |
| C | -4.72512900 | 1.85325100  | 1.26485800  |
| H | -4.37141200 | 2.46655100  | 0.42977800  |
| H | -5.75465400 | 2.11454400  | 1.49875000  |

|    |             |             |             |
|----|-------------|-------------|-------------|
| H  | -4.09583600 | 2.03135700  | 2.14217700  |
| C  | 1.76733100  | 2.19271300  | -0.34658100 |
| H  | 2.08318100  | 2.40228400  | -1.37532600 |
| O  | 2.69973200  | 1.41889100  | 0.34253900  |
| C  | 3.16259100  | 0.28513500  | -0.25791000 |
| C  | 4.15272000  | -0.41084200 | 0.46628300  |
| C  | 2.74372300  | -0.19445900 | -1.48813700 |
| C  | 4.69661100  | -1.57157100 | -0.06619900 |
| C  | 3.30013000  | -1.36266500 | -2.01656300 |
| C  | 4.26961600  | -2.04691100 | -1.30916900 |
| H  | 5.45755800  | -2.11437900 | 0.47803800  |
| H  | 2.95932600  | -1.72557900 | -2.97804200 |
| H  | 4.70387500  | -2.95454200 | -1.70944300 |
| H  | 1.69934200  | 3.14591200  | 0.18204300  |
| O  | 4.50032300  | 0.13445300  | 1.65533400  |
| C  | 5.47234900  | -0.54225300 | 2.42237200  |
| H  | 5.59546200  | 0.04122200  | 3.33198600  |
| H  | 5.13977700  | -1.55279200 | 2.68029400  |
| H  | 6.42841400  | -0.59680300 | 1.89172500  |
| H  | 1.96928500  | 0.31745200  | -2.04499400 |
| N  | 0.08182600  | 0.52200000  | 0.21030600  |
| Cl | -0.70822300 | 2.54542200  | -1.40883000 |

### Z-TS<sub>7-8</sub>

|   |             |             |             |
|---|-------------|-------------|-------------|
| C | 2.98164300  | -2.29922300 | -1.13791600 |
| C | 1.70245200  | -1.86058400 | -1.45996100 |
| C | 1.31229800  | -0.61717400 | -0.99206700 |
| C | 2.14401900  | 0.18820700  | -0.21240800 |
| C | 3.41736600  | -0.26519200 | 0.10406700  |
| C | 3.83962300  | -1.53146100 | -0.35983700 |
| H | 3.34353800  | -3.26053200 | -1.47994900 |
| H | 1.02850900  | -2.46494000 | -2.05214400 |
| H | 1.76714600  | 1.14048800  | 0.14875700  |
| C | -0.64563200 | 0.80504400  | -1.51833200 |
| O | 5.07982100  | -2.02263800 | -0.12762900 |
| C | 5.59119800  | -1.97700100 | 1.20628100  |
| H | 6.29241000  | -2.80636100 | 1.28229200  |
| H | 6.09852000  | -1.03309600 | 1.39608300  |
| H | 4.78447900  | -2.11080800 | 1.93106300  |
| O | 4.30056800  | 0.45380200  | 0.82522600  |
| C | 3.87351100  | 1.73013700  | 1.29555200  |
| H | 2.99398100  | 1.64242900  | 1.93816200  |
| H | 4.71214300  | 2.13158000  | 1.85853700  |
| H | 3.63162700  | 2.39381900  | 0.46147100  |

|    |             |             |             |
|----|-------------|-------------|-------------|
| C  | -1.99912800 | 1.42513400  | -1.57083700 |
| H  | -1.96597100 | 2.30144300  | -0.91096600 |
| O  | -2.97871300 | 0.49660100  | -1.24365700 |
| C  | -3.11141900 | 0.13023300  | 0.07782400  |
| C  | -4.14378200 | -0.79508000 | 0.32610500  |
| C  | -2.32506300 | 0.60741700  | 1.11112600  |
| C  | -4.36463200 | -1.22430300 | 1.62738300  |
| C  | -2.56157100 | 0.16679500  | 2.41679300  |
| C  | -3.57120000 | -0.74124800 | 2.67140500  |
| H  | -5.15297000 | -1.93344100 | 1.84022000  |
| H  | -1.94356100 | 0.55049300  | 3.21829200  |
| H  | -3.75749400 | -1.08570700 | 3.68110400  |
| H  | -2.17411500 | 1.75807500  | -2.59336000 |
| O  | -4.85399500 | -1.19229300 | -0.75677000 |
| C  | -5.92159300 | -2.09046800 | -0.53940200 |
| H  | -6.37247300 | -2.26093900 | -1.51436400 |
| H  | -5.56218800 | -3.04092000 | -0.13218100 |
| H  | -6.66693300 | -1.66174100 | 0.13781200  |
| H  | -1.52903900 | 1.32648000  | 0.94367100  |
| N  | 0.03715400  | -0.11264100 | -1.27806100 |
| Cl | 0.39604000  | 3.10113800  | 0.66398000  |
| O  | 0.27839800  | 2.44879400  | -2.09605300 |
| H  | 1.16157000  | 2.23508500  | -2.41830300 |
| H  | 0.40089000  | 2.86621800  | -1.16102400 |

### Z-TS'<sub>7-8</sub>

|   |             |             |             |
|---|-------------|-------------|-------------|
| C | -2.30638700 | -2.59016200 | -0.62234700 |
| C | -1.07313800 | -2.01002600 | -0.90654000 |
| C | -0.93069500 | -0.65129900 | -0.67962200 |
| C | -1.97492500 | 0.14461800  | -0.21112600 |
| C | -3.20356700 | -0.44234200 | 0.05275400  |
| C | -3.36663500 | -1.82967900 | -0.15155100 |
| H | -2.47362600 | -3.65023900 | -0.76804200 |
| H | -0.24681400 | -2.59159400 | -1.29444900 |
| H | -1.80733700 | 1.20853700  | -0.10709500 |
| C | 0.94202300  | 0.89178800  | -0.55909200 |
| O | -4.54245200 | -2.44885700 | 0.14484400  |
| C | -5.63485800 | -2.10559300 | -0.70662000 |
| H | -6.47829700 | -2.70757000 | -0.37446100 |
| H | -5.87868600 | -1.04611100 | -0.62233400 |
| H | -5.39265200 | -2.35378600 | -1.74447500 |
| O | -4.27002100 | 0.24204100  | 0.51252400  |
| C | -4.10041900 | 1.64374700  | 0.70751900  |
| H | -3.83098200 | 2.13861200  | -0.23026500 |



|    |             |             |             |
|----|-------------|-------------|-------------|
| H  | -5.06169500 | 2.00925000  | 1.05989900  |
| H  | -3.32747800 | 1.84578600  | 1.45400900  |
| C  | 2.14817300  | 1.74525600  | -0.73643900 |
| H  | 2.48382400  | 1.59057300  | -1.76748500 |
| O  | 3.15178100  | 1.43082900  | 0.20436100  |
| C  | 3.76063100  | 0.20480600  | 0.00772000  |
| C  | 3.28294500  | -0.90116700 | 0.72306000  |
| C  | 4.83078100  | 0.07757300  | -0.85928100 |
| C  | 3.88266300  | -2.14271900 | 0.53719800  |
| C  | 5.43498800  | -1.16491700 | -1.03871900 |
| C  | 4.95496600  | -2.26653100 | -0.34444500 |
| H  | 3.52325000  | -3.00737900 | 1.07995400  |
| H  | 6.27198900  | -1.26598400 | -1.71744300 |
| H  | 5.41710400  | -3.23682500 | -0.48023600 |
| H  | 1.84357700  | 2.77948900  | -0.59794200 |
| O  | 2.24734000  | -0.65745500 | 1.56406200  |
| C  | 1.43607700  | -1.75470100 | 1.95962700  |
| H  | 0.54031100  | -1.31964600 | 2.39901700  |
| H  | 1.15628200  | -2.35525700 | 1.08964600  |
| H  | 1.95055800  | -2.37709100 | 2.69663000  |
| H  | 5.18145200  | 0.95897500  | -1.38428400 |
| N  | 0.29321400  | -0.01591400 | -0.93221400 |
| Cl | -0.65512100 | 3.18703300  | -1.35531900 |
| O  | 0.45824500  | 1.35390700  | 1.28080000  |
| H  | -0.02180100 | 2.20378400  | 1.47902800  |
| H  | 1.28079000  | 1.28308600  | 1.78193800  |
| O  | -1.10595000 | 3.43751700  | 1.55183800  |
| H  | -1.09439700 | 3.56990300  | 0.56699500  |
| H  | -0.95809600 | 4.29955600  | 1.94732500  |

### Z-Int8

|   |             |             |             |
|---|-------------|-------------|-------------|
| C | 3.21217900  | -2.18173400 | -0.95069800 |
| C | 1.87195700  | -1.99067300 | -1.28226400 |
| C | 1.20150200  | -0.88405500 | -0.77894600 |
| C | 1.86503400  | 0.02465900  | 0.05926800  |
| C | 3.20200300  | -0.17671900 | 0.39050000  |
| C | 3.88263600  | -1.29633300 | -0.12523800 |
| H | 3.76618300  | -3.02990100 | -1.33551000 |
| H | 1.34418700  | -2.69168000 | -1.91588100 |
| H | 1.30724700  | 0.86254700  | 0.46066300  |
| C | -0.48999700 | 0.30878100  | -1.78237800 |
| O | 5.20741400  | -1.48913200 | 0.14651800  |
| C | 5.47195900  | -1.92847400 | 1.47484300  |
| H | 6.55262600  | -2.03118800 | 1.55600400  |

|    |             |             |             |
|----|-------------|-------------|-------------|
| H  | 5.11574300  | -1.19909900 | 2.20492100  |
| H  | 4.99631600  | -2.89809900 | 1.65327200  |
| O  | 3.92055000  | 0.64596400  | 1.18819900  |
| C  | 3.28329300  | 1.81697300  | 1.66634800  |
| H  | 2.42698500  | 1.56919800  | 2.30105100  |
| H  | 4.03124400  | 2.34551200  | 2.25249700  |
| H  | 2.95040800  | 2.44917500  | 0.83807900  |
| C  | -1.91889800 | 0.67082000  | -2.10800400 |
| H  | -2.06859200 | 1.74192800  | -1.91898500 |
| O  | -2.84993500 | -0.12014200 | -1.43672100 |
| C  | -3.02724200 | 0.08513000  | -0.09983500 |
| C  | -3.95978800 | -0.77371200 | 0.51759000  |
| C  | -2.38342800 | 1.05463800  | 0.65024500  |
| C  | -4.22090400 | -0.63369100 | 1.87367500  |
| C  | -2.65649500 | 1.19009100  | 2.01401300  |
| C  | -3.56856800 | 0.35003300  | 2.62239400  |
| H  | -4.93330900 | -1.28666300 | 2.35926200  |
| H  | -2.14353900 | 1.95561400  | 2.58291100  |
| H  | -3.78466200 | 0.44487900  | 3.67919800  |
| H  | -2.07860900 | 0.50054800  | -3.17474600 |
| O  | -4.53960800 | -1.69018500 | -0.29328800 |
| C  | -5.43141400 | -2.60923600 | 0.29818000  |
| H  | -5.75580300 | -3.26979000 | -0.50269600 |
| H  | -4.93377400 | -3.19593600 | 1.07708900  |
| H  | -6.30205700 | -2.10073100 | 0.72528100  |
| H  | -1.65569700 | 1.71453500  | 0.19722900  |
| N  | -0.16769800 | -0.67955600 | -1.07595100 |
| Cl | 0.34442100  | 3.68274600  | -0.37290800 |
| O  | 0.36605700  | 1.19678400  | -2.37496000 |
| H  | 1.27557500  | 0.88144700  | -2.25409300 |
| H  | 0.36945700  | 2.88261000  | -1.39059400 |

### Z-TS<sub>8-9</sub>

|   |             |             |             |
|---|-------------|-------------|-------------|
| C | -1.38801000 | -2.62810700 | -0.75215300 |
| C | -0.00300900 | -2.52092700 | -0.66183300 |
| C | 0.55087800  | -1.58780600 | 0.20178900  |
| C | -0.26819000 | -0.77110200 | 0.98412800  |
| C | -1.65068600 | -0.87185400 | 0.87970000  |
| C | -2.21584000 | -1.82241100 | 0.00927600  |
| H | -1.85248500 | -3.36024600 | -1.40179800 |
| H | 0.64258700  | -3.16663000 | -1.24507600 |
| H | 0.19875100  | -0.05177900 | 1.64497700  |
| C | 2.76565900  | -0.99152000 | -0.54017100 |
| O | -3.56850300 | -2.02286900 | -0.03611200 |

|   |             |             |             |
|---|-------------|-------------|-------------|
| C | -4.31097700 | -0.98710300 | -0.66224800 |
| H | -5.34355100 | -1.33050800 | -0.70322100 |
| H | -4.25370700 | -0.06166500 | -0.08567500 |
| H | -3.94037300 | -0.81840300 | -1.67901100 |
| O | -2.52394400 | -0.10500800 | 1.58408200  |
| C | -1.99217500 | 0.69849500  | 2.62316600  |
| H | -1.32099500 | 1.46735000  | 2.22811200  |
| H | -2.84702200 | 1.16959900  | 3.10390600  |
| H | -1.45526100 | 0.08307600  | 3.35124100  |
| C | 2.31624700  | -0.30808800 | -1.82504600 |
| H | 3.13894800  | 0.33552900  | -2.14932200 |
| O | 1.10882500  | 0.39866800  | -1.71735800 |
| C | 1.06296200  | 1.44103500  | -0.84397300 |
| C | -0.20741800 | 2.03912000  | -0.69154600 |
| C | 2.13968200  | 1.90912200  | -0.10771100 |
| C | -0.36105500 | 3.09014000  | 0.20205700  |
| C | 1.97063800  | 2.96567700  | 0.79350500  |
| C | 0.72898100  | 3.55017600  | 0.94869200  |
| H | -1.32832700 | 3.55722400  | 0.33145400  |
| H | 2.82076800  | 3.31435100  | 1.36600200  |
| H | 0.58966000  | 4.36801300  | 1.64481100  |
| H | 2.14944000  | -1.06954200 | -2.58884100 |
| O | -1.19695500 | 1.51523000  | -1.44911600 |
| C | -2.49588100 | 2.03445000  | -1.25816000 |
| H | -3.13999600 | 1.48885900  | -1.94378800 |
| H | -2.83361400 | 1.86768200  | -0.22901800 |
| H | -2.53597000 | 3.10237300  | -1.49588500 |
| H | 3.11931500  | 1.45881900  | -0.21132000 |
| N | 1.96083200  | -1.49352200 | 0.35421200  |
| O | 4.03907500  | -1.04111600 | -0.37393500 |
| H | 2.73200800  | -1.94998600 | 1.28902300  |
| O | 3.83994200  | -2.09244800 | 1.73678900  |
| H | 4.10400000  | -3.00724000 | 1.86004500  |
| H | 4.19165500  | -1.59765300 | 0.68227000  |

### Z-Int9

|   |             |             |             |
|---|-------------|-------------|-------------|
| C | -1.38767700 | -2.61873400 | -0.80460400 |
| C | -0.00309300 | -2.49236300 | -0.73562200 |
| C | 0.54724400  | -1.57561100 | 0.14400300  |
| C | -0.26590800 | -0.79072600 | 0.96242100  |
| C | -1.64819100 | -0.91784700 | 0.88930500  |
| C | -2.21240200 | -1.85235800 | 0.00026600  |
| H | -1.85357500 | -3.33813600 | -1.46706600 |
| H | 0.64363000  | -3.11113000 | -1.34595700 |

|   |             |             |             |
|---|-------------|-------------|-------------|
| H | 0.20238400  | -0.07320600 | 1.62427700  |
| C | 2.80832200  | -0.94450600 | -0.67743000 |
| O | -3.56057900 | -2.07402100 | -0.02620300 |
| C | -4.33340100 | -1.03008200 | -0.60189700 |
| H | -5.36169200 | -1.38714300 | -0.62519700 |
| H | -4.27251200 | -0.12137900 | -0.00000100 |
| H | -3.99256100 | -0.82755700 | -1.62277100 |
| O | -2.52001400 | -0.19008400 | 1.63360000  |
| C | -1.97850100 | 0.61458100  | 2.66716400  |
| H | -1.33995500 | 1.40560500  | 2.26147700  |
| H | -2.83062100 | 1.05700900  | 3.17878200  |
| H | -1.40385600 | 0.00492200  | 3.37077800  |
| C | 2.22801200  | -0.26697600 | -1.92223600 |
| H | 3.01532100  | 0.38914800  | -2.30343800 |
| O | 1.01787100  | 0.42313000  | -1.73661000 |
| C | 1.00500300  | 1.46178500  | -0.85992100 |
| C | -0.26188000 | 2.05039500  | -0.64951300 |
| C | 2.10975800  | 1.93594800  | -0.16999400 |
| C | -0.38531200 | 3.09501600  | 0.25610700  |
| C | 1.97128400  | 2.98706200  | 0.74271400  |
| C | 0.73294800  | 3.56011700  | 0.95651600  |
| H | -1.34928400 | 3.55511600  | 0.42828700  |
| H | 2.84302900  | 3.34103300  | 1.27826500  |
| H | 0.61806300  | 4.37382000  | 1.66186500  |
| H | 2.01959600  | -1.03144900 | -2.67291400 |
| O | -1.27958500 | 1.52344600  | -1.36835300 |
| C | -2.57075300 | 2.04077000  | -1.12844200 |
| H | -3.23850000 | 1.50113300  | -1.79601800 |
| H | -2.87355100 | 1.86526000  | -0.08976400 |
| H | -2.61947400 | 3.11060200  | -1.35538300 |
| H | 3.08705100  | 1.49363200  | -0.31953500 |
| N | 1.96612900  | -1.44182500 | 0.25298800  |
| O | 4.02786000  | -1.00411100 | -0.56667000 |
| H | 2.42551900  | -1.81514000 | 1.08421500  |
| O | 4.19812300  | -2.08960500 | 1.96173900  |
| H | 4.79158700  | -2.78947300 | 2.23784900  |
| H | 4.52437100  | -1.75876500 | 1.10826300  |

### Z-Int10

|   |             |             |             |
|---|-------------|-------------|-------------|
| C | 2.06166500  | -2.00697500 | 0.86718100  |
| C | 0.80211800  | -2.59472300 | 0.80882900  |
| C | -0.13981100 | -2.10762000 | -0.08623800 |
| C | 0.17710200  | -1.04075400 | -0.92939300 |
| C | 1.41309200  | -0.41243000 | -0.82044500 |

|   |             |             |             |
|---|-------------|-------------|-------------|
| C | 2.37406600  | -0.91813600 | 0.07463800  |
| H | 2.81412500  | -2.36558000 | 1.55989100  |
| H | 0.54565600  | -3.41618800 | 1.46656100  |
| H | -0.55375200 | -0.68779800 | -1.64403700 |
| C | -2.67556400 | -2.27902300 | -0.23731900 |
| O | 3.58223500  | -0.29222000 | 0.22743400  |
| C | 4.47440500  | -0.45625800 | -0.87056300 |
| H | 5.38452800  | 0.08170000  | -0.61097100 |
| H | 4.70313200  | -1.51671600 | -1.01485800 |
| H | 4.04786300  | -0.03926500 | -1.78462000 |
| O | 1.77804100  | 0.68893900  | -1.52021800 |
| C | 0.81246800  | 1.28622700  | -2.36886400 |
| H | 1.28879400  | 2.17168200  | -2.78378600 |
| H | 0.53438500  | 0.60793400  | -3.18193100 |
| H | -0.07669500 | 1.58350700  | -1.80534500 |
| C | -2.91061000 | -0.77555800 | -0.21956500 |
| H | -2.75440300 | -0.39542900 | -1.23689100 |
| O | -2.05094700 | -0.14094300 | 0.69628400  |
| C | -1.71091700 | 1.15146500  | 0.44160200  |
| C | -0.51122700 | 1.60317500  | 1.03518500  |
| C | -2.45713900 | 2.00794400  | -0.35341800 |
| C | -0.07790100 | 2.89830000  | 0.77707300  |
| C | -2.01508400 | 3.31154300  | -0.59853300 |
| C | -0.82763400 | 3.74837400  | -0.04140700 |
| H | 0.85041500  | 3.25300100  | 1.20331600  |
| H | -2.60916100 | 3.96897000  | -1.22083300 |
| H | -0.47062900 | 4.75353900  | -0.22875800 |
| H | -3.96073100 | -0.63035000 | 0.04479900  |
| O | 0.13359100  | 0.71034000  | 1.81280900  |
| C | 1.39379400  | 1.09294400  | 2.33461700  |
| H | 1.77129000  | 0.22099900  | 2.86434000  |
| H | 2.09066600  | 1.35168100  | 1.53122300  |
| H | 1.28972500  | 1.93216400  | 3.03001500  |
| H | -3.39391600 | 1.66961000  | -0.77831600 |
| N | -1.39802400 | -2.76068900 | -0.15741900 |
| O | -3.62179100 | -3.02856600 | -0.35406100 |
| H | -1.38109200 | -3.77000600 | -0.08613600 |

### Z-Int11

|   |             |             |             |
|---|-------------|-------------|-------------|
| C | -0.48626100 | -2.79862900 | -0.20175600 |
| C | 0.68973400  | -2.12742200 | 0.12451300  |
| C | 0.59014700  | -0.96828100 | 0.87379200  |
| C | -0.63790900 | -0.46327600 | 1.29926300  |
| C | -1.80406000 | -1.14100700 | 0.96440700  |
| C | -1.72081800 | -2.32881900 | 0.21467500  |

|                             |             |             |             |
|-----------------------------|-------------|-------------|-------------|
| H                           | -0.46484400 | -3.71717200 | -0.77615600 |
| H                           | 1.67581000  | -2.46329000 | -0.19723200 |
| H                           | -0.65797100 | 0.46573900  | 1.85484800  |
| C                           | 2.70941000  | 0.21466400  | 0.39145000  |
| O                           | -2.84211000 | -3.06540800 | -0.05372700 |
| C                           | -3.71653100 | -2.49513700 | -1.01660600 |
| H                           | -4.51629600 | -3.21779100 | -1.17113000 |
| H                           | -4.13547600 | -1.55355700 | -0.65469800 |
| H                           | -3.18468700 | -2.33113000 | -1.96001300 |
| O                           | -3.05411400 | -0.73346700 | 1.31579300  |
| C                           | -3.15326400 | 0.39152500  | 2.16759100  |
| H                           | -2.73372900 | 1.28685700  | 1.69617700  |
| H                           | -4.21602400 | 0.53704000  | 2.35067600  |
| H                           | -2.64154400 | 0.20791900  | 3.11753200  |
| C                           | 2.33963600  | 0.43302700  | -1.06865900 |
| H                           | 2.98039400  | 1.24168100  | -1.43440000 |
| O                           | 0.98042200  | 0.69644900  | -1.32021700 |
| C                           | 0.41666200  | 1.78704800  | -0.74623300 |
| C                           | -0.98167600 | 1.89917700  | -0.91999200 |
| C                           | 1.09581900  | 2.74386500  | -0.00765300 |
| C                           | -1.65819400 | 2.96406200  | -0.34120000 |
| C                           | 0.40295600  | 3.81206500  | 0.57193600  |
| C                           | -0.96446000 | 3.91977900  | 0.40937000  |
| H                           | -2.72854200 | 3.06112400  | -0.46577900 |
| H                           | 0.94863600  | 4.54906600  | 1.14765400  |
| H                           | -1.50787100 | 4.74379000  | 0.85521800  |
| H                           | 2.60053300  | -0.50284400 | -1.57352800 |
| O                           | -1.55903800 | 0.91949000  | -1.65183100 |
| C                           | -2.96279400 | 0.95895900  | -1.78686700 |
| H                           | -3.22731600 | 0.10957600  | -2.41208000 |
| H                           | -3.45271600 | 0.85852000  | -0.81119100 |
| H                           | -3.29049700 | 1.88334200  | -2.27374500 |
| H                           | 2.16655500  | 2.66703200  | 0.13582300  |
| N                           | 1.78586800  | -0.26518000 | 1.24014400  |
| O                           | 3.85084800  | 0.49807200  | 0.77292500  |
| H                           | 2.11571600  | -0.36438300 | 2.19231400  |
| O                           | 3.81254300  | -2.20561700 | -0.83493300 |
| H                           | 3.77983500  | -2.99519100 | -1.37408600 |
| Na                          | 5.23001500  | -1.11780100 | 0.15277400  |
| <b>Z-TS<sub>11-12</sub></b> |             |             |             |
| C                           | -1.27230100 | -2.43618300 | -0.72623500 |
| C                           | 0.03740500  | -2.05220800 | -0.45336700 |
| C                           | 0.27573500  | -1.11501400 | 0.54520500  |
| C                           | -0.80093400 | -0.54239900 | 1.23507700  |

|    |             |             |             |
|----|-------------|-------------|-------------|
| C  | -2.10469100 | -0.93093800 | 0.95359600  |
| C  | -2.34258800 | -1.91103600 | -0.02504400 |
| H  | -1.48092300 | -3.18513200 | -1.48141000 |
| H  | 0.85985100  | -2.47455700 | -1.01485400 |
| H  | -0.59278000 | 0.22885100  | 1.96613700  |
| C  | 2.69190300  | -0.54693500 | 0.11665700  |
| O  | -3.60668400 | -2.40082700 | -0.23338700 |
| C  | -4.46793200 | -1.54074200 | -0.96106500 |
| H  | -5.43220600 | -2.04376500 | -1.01978100 |
| H  | -4.58641400 | -0.58082600 | -0.45217100 |
| H  | -4.07859900 | -1.38175000 | -1.97268100 |
| O  | -3.20426900 | -0.41292800 | 1.56607800  |
| C  | -2.99260500 | 0.59453500  | 2.53414900  |
| H  | -2.48062100 | 1.46034300  | 2.09855600  |
| H  | -3.97989200 | 0.88930900  | 2.88344700  |
| H  | -2.40717000 | 0.21462700  | 3.37727500  |
| C  | 2.43968300  | -0.15393900 | -1.35841600 |
| H  | 3.29426700  | 0.46506800  | -1.65095500 |
| O  | 1.21892400  | 0.52990000  | -1.56509600 |
| C  | 0.94306100  | 1.64638900  | -0.84605300 |
| C  | -0.41651400 | 2.03035800  | -0.84111600 |
| C  | 1.87137700  | 2.38982800  | -0.13455900 |
| C  | -0.80967100 | 3.14838200  | -0.11726400 |
| C  | 1.46462400  | 3.51575000  | 0.58786900  |
| C  | 0.13436700  | 3.89168300  | 0.59900800  |
| H  | -1.84835600 | 3.45155000  | -0.10302300 |
| H  | 2.20064000  | 4.08336400  | 1.14375900  |
| H  | -0.18635000 | 4.76128100  | 1.15979700  |
| H  | 2.39445400  | -1.03087600 | -1.99376800 |
| O  | -1.24746200 | 1.24104000  | -1.56151200 |
| C  | -2.62621900 | 1.51729000  | -1.48451300 |
| H  | -3.11501500 | 0.77314600  | -2.10873000 |
| H  | -2.99108900 | 1.42159400  | -0.45451800 |
| H  | -2.85614800 | 2.51870600  | -1.86443600 |
| H  | 2.90662200  | 2.07424100  | -0.10478700 |
| N  | 1.56947600  | -0.70815900 | 0.90895700  |
| O  | 3.72686700  | -0.10146400 | 0.67876000  |
| H  | 1.72558400  | -0.43389000 | 1.86749000  |
| O  | 3.27561200  | -2.41056500 | -0.27738900 |
| H  | 2.59707500  | -3.04739200 | -0.04607500 |
| Na | 5.05623900  | -1.79972300 | 0.61862000  |

### Z-Int12

|   |             |             |             |
|---|-------------|-------------|-------------|
| C | -1.27743200 | -2.51993100 | -0.63502000 |
|---|-------------|-------------|-------------|

|    |             |             |             |
|----|-------------|-------------|-------------|
| C  | 0.04436100  | -2.14299600 | -0.41718800 |
| C  | 0.33630300  | -1.15699300 | 0.52679100  |
| C  | -0.72405300 | -0.53699300 | 1.20678400  |
| C  | -2.04070500 | -0.91205800 | 0.97261200  |
| C  | -2.32364200 | -1.93919600 | 0.05756100  |
| H  | -1.51597800 | -3.29957100 | -1.34944600 |
| H  | 0.82596100  | -2.59968100 | -1.01161300 |
| H  | -0.49189000 | 0.26202900  | 1.90038300  |
| C  | 2.77785800  | -0.69767100 | -0.05583700 |
| O  | -3.60344700 | -2.41190800 | -0.10300400 |
| C  | -4.45416200 | -1.57072900 | -0.86311700 |
| H  | -5.41972200 | -2.07228300 | -0.91883700 |
| H  | -4.57554300 | -0.59683400 | -0.38174700 |
| H  | -4.05350300 | -1.43821600 | -1.87426000 |
| O  | -3.11420400 | -0.33616700 | 1.58070800  |
| C  | -2.85825000 | 0.71177100  | 2.49415900  |
| H  | -2.33319200 | 1.54171600  | 2.00789200  |
| H  | -3.83122100 | 1.04775000  | 2.84697300  |
| H  | -2.26640000 | 0.35758300  | 3.34398100  |
| C  | 2.39475400  | -0.15761900 | -1.48267900 |
| H  | 3.19889400  | 0.52648700  | -1.77149600 |
| O  | 1.13639800  | 0.47902400  | -1.58158600 |
| C  | 0.86904000  | 1.58278900  | -0.84615500 |
| C  | -0.48558800 | 1.98746500  | -0.85925000 |
| C  | 1.79330200  | 2.29202500  | -0.09404800 |
| C  | -0.87839800 | 3.09247100  | -0.11632300 |
| C  | 1.38405600  | 3.40458800  | 0.64955000  |
| C  | 0.05996600  | 3.80217000  | 0.64123300  |
| H  | -1.91275800 | 3.41068700  | -0.11713700 |
| H  | 2.11539200  | 3.94527600  | 1.23787700  |
| H  | -0.26044000 | 4.66174500  | 1.21763500  |
| H  | 2.33907000  | -0.97477200 | -2.19917300 |
| O  | -1.31280700 | 1.22788300  | -1.61538500 |
| C  | -2.69172100 | 1.50304400  | -1.53524100 |
| H  | -3.17978800 | 0.77767600  | -2.18211000 |
| H  | -3.05895000 | 1.37840700  | -0.50946300 |
| H  | -2.92041000 | 2.51466900  | -1.88806100 |
| H  | 2.81914900  | 1.94674100  | -0.04173200 |
| N  | 1.64230700  | -0.78636200 | 0.86325500  |
| O  | 3.77271100  | -0.03884500 | 0.48466200  |
| H  | 1.70409300  | -0.01055300 | 1.50848500  |
| O  | 3.23638900  | -2.13756200 | -0.28259000 |
| H  | 2.54501000  | -2.72042900 | 0.04539800  |
| Na | 5.11832800  | -1.62419200 | 0.76074700  |



## Z-TS<sub>12-13</sub>

|   |             |             |             |
|---|-------------|-------------|-------------|
| C | -2.17631600 | -2.49515100 | -1.12276200 |
| C | -0.89045700 | -2.82995800 | -0.70497600 |
| C | -0.32600800 | -2.19206600 | 0.40112400  |
| C | -1.09945300 | -1.25147300 | 1.10220000  |
| C | -2.37884600 | -0.92373000 | 0.68448600  |
| C | -2.92730700 | -1.54796600 | -0.44974300 |
| H | -2.62866800 | -2.97802600 | -1.98129600 |
| H | -0.31581300 | -3.58026100 | -1.23644500 |
| H | -0.64012100 | -0.72974100 | 1.93191200  |
| C | 2.48635500  | -1.39551600 | -0.16786100 |
| O | -4.20393600 | -1.27720300 | -0.87524600 |
| C | -4.41266800 | 0.04233300  | -1.35701700 |
| H | -5.33209400 | 0.01814300  | -1.94173800 |
| H | -4.52261100 | 0.74613000  | -0.52974900 |
| H | -3.57942400 | 0.35374500  | -1.99566000 |
| O | -3.16622900 | 0.00476500  | 1.30050700  |
| C | -2.65595700 | 0.60764800  | 2.47093700  |
| H | -1.73076000 | 1.15385600  | 2.26095300  |
| H | -3.42348000 | 1.30033300  | 2.81316200  |
| H | -2.47069800 | -0.14143800 | 3.24754400  |
| C | 1.68344200  | -0.64147400 | -1.20916600 |
| H | 2.37886300  | -0.20676500 | -1.93882000 |
| O | 0.85101700  | 0.33803200  | -0.63523900 |
| C | 1.28323600  | 1.60943200  | -0.46932000 |
| C | 0.26475100  | 2.54588300  | -0.18107000 |
| C | 2.59843900  | 2.03466300  | -0.56233500 |
| C | 0.58956200  | 3.88624900  | -0.02671200 |
| C | 2.91422700  | 3.38714000  | -0.40738200 |
| C | 1.91739800  | 4.30797400  | -0.14542200 |
| H | -0.18330500 | 4.61441100  | 0.17990400  |
| H | 3.94688200  | 3.70497100  | -0.48339000 |
| H | 2.15464300  | 5.35762000  | -0.02410400 |
| H | 1.02426200  | -1.33535400 | -1.72851100 |
| O | -0.98853900 | 2.03218600  | -0.07686500 |
| C | -2.04774200 | 2.93846400  | 0.14048100  |
| H | -2.95050700 | 2.33199200  | 0.18381800  |
| H | -1.92408600 | 3.47577600  | 1.08778500  |
| H | -2.12373100 | 3.66237600  | -0.67773400 |
| H | 3.38299900  | 1.30610500  | -0.71327600 |
| N | 1.01197400  | -2.41225100 | 0.73296100  |
| O | 3.18852500  | -0.79236000 | 0.67207600  |
| H | 1.19731000  | -2.15477500 | 1.69718500  |

|    |            |             |             |
|----|------------|-------------|-------------|
| O  | 2.90398700 | -2.66195900 | -0.57543800 |
| H  | 1.98806800 | -3.04256600 | -0.03864800 |
| Na | 4.64126600 | -2.41937900 | 0.75502200  |

### Z-TS<sub>12-13</sub>

|   |             |             |             |
|---|-------------|-------------|-------------|
| C | -1.02462600 | -3.06437100 | -0.21166400 |
| C | 0.33701700  | -2.78025000 | -0.31861800 |
| C | 0.84942100  | -1.71245000 | 0.39184400  |
| C | 0.04575300  | -0.92261200 | 1.21396800  |
| C | -1.31337800 | -1.19148300 | 1.28907900  |
| C | -1.84756000 | -2.28434000 | 0.57650100  |
| H | -1.46916100 | -3.89732600 | -0.74302100 |
| H | 0.98573100  | -3.37735900 | -0.94860700 |
| H | 0.49867100  | -0.07578000 | 1.71450600  |
| C | 2.68999700  | 0.10412900  | -0.06086600 |
| O | -3.17569100 | -2.59287300 | 0.69001600  |
| C | -4.02358700 | -1.70690500 | -0.02793700 |
| H | -5.04681200 | -2.01369100 | 0.18496500  |
| H | -3.87022800 | -0.67393100 | 0.29628800  |
| H | -3.82547200 | -1.78907200 | -1.10153200 |
| O | -2.19602000 | -0.46706600 | 2.01661800  |
| C | -1.70821700 | 0.70408600  | 2.64887100  |
| H | -1.28293200 | 1.39768100  | 1.91761500  |
| H | -2.56935600 | 1.16214900  | 3.13082000  |
| H | -0.95667700 | 0.45472800  | 3.40461100  |
| C | 1.93018300  | 0.55106600  | -1.33243200 |
| H | 2.29688900  | 1.55542700  | -1.57105800 |
| O | 0.51560000  | 0.52570900  | -1.28921800 |
| C | -0.19157500 | 1.55092500  | -0.76126400 |
| C | -1.57905800 | 1.52653600  | -1.03146200 |
| C | 0.33719000  | 2.58833100  | -0.00527300 |
| C | -2.39257500 | 2.54083400  | -0.54268000 |
| C | -0.49036300 | 3.60868600  | 0.47055600  |
| C | -1.84867500 | 3.58621800  | 0.20809800  |
| H | -3.45473700 | 2.52895100  | -0.74889900 |
| H | -0.05986400 | 4.40933400  | 1.05993700  |
| H | -2.49737400 | 4.36986300  | 0.57965800  |
| H | 2.19594900  | -0.12256000 | -2.14910100 |
| O | -2.02601400 | 0.48765000  | -1.78366700 |
| C | -3.27833200 | 0.64765600  | -2.41506900 |
| H | -3.38548500 | -0.19805300 | -3.09194200 |
| H | -4.10326000 | 0.63684100  | -1.69523500 |
| H | -3.31031900 | 1.58202000  | -2.98494400 |
| H | 1.38537600  | 2.55682800  | 0.25816200  |

|    |            |             |             |
|----|------------|-------------|-------------|
| N  | 2.25959600 | -1.40103200 | 0.26006300  |
| O  | 2.56015600 | 0.84690300  | 1.00961300  |
| H  | 2.73202400 | -1.56247000 | 1.15019300  |
| O  | 4.04198300 | -0.05264900 | -0.45250000 |
| H  | 4.13078400 | -0.99728600 | -1.03840300 |
| Na | 4.66915200 | 1.24862300  | 1.15192900  |
| O  | 3.89085000 | -2.23805700 | -1.41423400 |
| H  | 3.78361400 | -2.42598100 | -2.34713900 |
| H  | 2.80819000 | -2.00121300 | -0.53146800 |

### Z-Int13

|   |             |             |             |
|---|-------------|-------------|-------------|
| C | 3.45144500  | -2.05794300 | 0.80480900  |
| C | 2.38605600  | -2.19326700 | 1.69182300  |
| C | 1.12352800  | -1.71085800 | 1.33892200  |
| C | 0.94680000  | -1.11985100 | 0.07777600  |
| C | 2.01417000  | -0.99564500 | -0.80097900 |
| C | 3.29023400  | -1.45784200 | -0.43224400 |
| H | 4.43838300  | -2.42461300 | 1.06372100  |
| H | 2.53808500  | -2.65223500 | 2.66242300  |
| H | -0.04065400 | -0.75373800 | -0.17353800 |
| C | -3.22131900 | -0.10137700 | 0.54611900  |
| O | 4.35120800  | -1.35858000 | -1.29989800 |
| C | 4.84015300  | -0.03396000 | -1.44319000 |
| H | 5.65688500  | -0.07617300 | -2.16311300 |
| H | 4.05778700  | 0.63304700  | -1.81537700 |
| H | 5.21875400  | 0.33786200  | -0.48390800 |
| O | 1.91069300  | -0.43550800 | -2.03558600 |
| C | 0.60575500  | -0.18073500 | -2.51654200 |
| H | 0.06868700  | 0.52627600  | -1.88080200 |
| H | 0.72888500  | 0.24867700  | -3.50920300 |
| H | 0.03773600  | -1.11589500 | -2.58446100 |
| C | -2.94327000 | 1.03641500  | 1.53092900  |
| H | -3.51872900 | 1.92029700  | 1.24434900  |
| O | -1.57564300 | 1.31074000  | 1.68322400  |
| C | -0.93367900 | 1.89679800  | 0.64017500  |
| C | 0.47156300  | 1.98556700  | 0.77764500  |
| C | -1.54743100 | 2.40475300  | -0.49522900 |
| C | 1.21850900  | 2.59059800  | -0.22396700 |
| C | -0.78519600 | 3.03599000  | -1.48666100 |
| C | 0.58638300  | 3.12939700  | -1.35016500 |
| H | 2.29551100  | 2.64661700  | -0.13538300 |
| H | -1.28014300 | 3.44010600  | -2.36110900 |
| H | 1.18352400  | 3.60628600  | -2.11780300 |
| H | -3.29226200 | 0.71001400  | 2.51290400  |

|    |             |             |             |
|----|-------------|-------------|-------------|
| O  | 0.97154200  | 1.45407400  | 1.90897400  |
| C  | 2.37596400  | 1.33785900  | 2.01781800  |
| H  | 2.55640800  | 0.78672900  | 2.93805500  |
| H  | 2.78900400  | 0.77469000  | 1.17464600  |
| H  | 2.84831500  | 2.32469000  | 2.07836100  |
| H  | -2.61901700 | 2.31878400  | -0.62471500 |
| N  | 0.05431600  | -1.74771700 | 2.21926200  |
| O  | -2.31509900 | -0.94806100 | 0.34248800  |
| H  | -0.84421600 | -1.50131000 | 1.82075900  |
| O  | -4.36468500 | -0.14283800 | 0.02842900  |
| H  | -5.73618600 | -1.09228400 | -0.86832000 |
| Na | -3.60423200 | -2.09638800 | -1.03677900 |
| O  | -5.78448600 | -1.90681800 | -1.39933700 |
| H  | -6.68904000 | -2.04108100 | -1.68239700 |
| H  | 0.04239300  | -2.50193400 | 2.88607000  |

### **E-lignin<sup>oxime</sup>**

|   |             |             |             |
|---|-------------|-------------|-------------|
| C | 1.15525500  | -0.22502600 | -1.69758900 |
| C | 0.06363300  | 0.55474700  | -1.34197000 |
| C | 0.10579000  | 1.32559100  | -0.18135700 |
| C | 1.27099300  | 1.34763300  | 0.58459000  |
| C | 2.37391700  | 0.59016700  | 0.21728500  |
| C | 2.30476600  | -0.22724000 | -0.91669200 |
| H | 1.13130000  | -0.86179100 | -2.57414900 |
| H | -0.83924600 | 0.54219400  | -1.94033300 |
| H | 1.34482300  | 1.94570400  | 1.48641300  |
| C | -1.10400100 | 2.03793900  | 0.31137800  |
| O | 3.36310600  | -1.02299900 | -1.26755800 |
| C | 3.52670400  | -2.14857800 | -0.40691200 |
| H | 4.38800500  | -2.70077200 | -0.77928200 |
| H | 3.70536600  | -1.82604400 | 0.62219000  |
| H | 2.63515500  | -2.78224600 | -0.44577600 |
| O | 3.49417000  | 0.60972300  | 1.00490000  |
| C | 4.62875500  | 1.21440200  | 0.38536600  |
| H | 4.41344300  | 2.26060500  | 0.14884500  |
| H | 5.43805700  | 1.16293200  | 1.11163400  |
| H | 4.90725800  | 0.67791100  | -0.52410700 |
| C | -1.61708900 | 1.72552000  | 1.70020200  |
| H | -0.77747400 | 1.65827500  | 2.40084000  |
| O | -2.38864200 | 0.52726900  | 1.74591200  |
| C | -1.79313300 | -0.60836800 | 1.26025300  |
| C | -2.38438600 | -1.22672400 | 0.14510600  |
| C | -0.65516500 | -1.15114400 | 1.83246500  |
| C | -1.81493300 | -2.38824200 | -0.37080600 |

|   |             |             |             |
|---|-------------|-------------|-------------|
| C | -0.07120400 | -2.29753600 | 1.29650400  |
| C | -0.65644300 | -2.91308000 | 0.20067500  |
| H | -2.25370900 | -2.88072800 | -1.22803300 |
| H | 0.82728800  | -2.70451100 | 1.74405100  |
| H | -0.21859700 | -3.81007400 | -0.22127400 |
| H | -2.29432900 | 2.51431800  | 2.02068200  |
| O | -3.47496600 | -0.60978400 | -0.36811800 |
| C | -4.08841100 | -1.20057400 | -1.49277400 |
| H | -4.93447100 | -0.56424300 | -1.74211600 |
| H | -3.40087600 | -1.24266000 | -2.34450400 |
| H | -4.44648100 | -2.20987000 | -1.26535300 |
| H | -0.21317900 | -0.65739700 | 2.69067400  |
| N | -1.79368000 | 2.88672500  | -0.34151400 |
| O | -1.29841800 | 3.12280300  | -1.61124400 |
| H | -1.88886500 | 3.79831200  | -1.95527500 |

#### **E-Int4**

|   |             |             |             |
|---|-------------|-------------|-------------|
| C | -0.87297900 | 0.95273200  | 1.99069800  |
| C | -0.01554200 | 0.01364300  | 1.44064100  |
| C | 0.06869000  | -0.12904800 | 0.05512000  |
| C | -0.68766200 | 0.70784100  | -0.76501000 |
| C | -1.51235000 | 1.67752200  | -0.22133600 |
| C | -1.63954800 | 1.78028200  | 1.17249300  |
| H | -0.97437400 | 1.06422900  | 3.06364000  |
| H | 0.55758500  | -0.63850600 | 2.08704700  |
| H | -0.62718200 | 0.65078500  | -1.84567600 |
| C | 0.89702500  | -1.18959400 | -0.55375000 |
| O | -2.45235700 | 2.68642700  | 1.77106600  |
| C | -3.77804900 | 2.82814100  | 1.25615700  |
| H | -3.82563300 | 3.60985500  | 0.49698700  |
| H | -4.12184500 | 1.88661000  | 0.82273800  |
| H | -4.40147200 | 3.10083700  | 2.10639200  |
| O | -2.19332000 | 2.52522100  | -1.05342300 |
| C | -1.62635400 | 3.83443400  | -1.08517200 |
| H | -0.60025500 | 3.79298800  | -1.46158300 |
| H | -2.24431300 | 4.42416500  | -1.76014800 |
| H | -1.62976300 | 4.28526400  | -0.08738700 |
| C | 0.30496300  | -2.07400500 | -1.63238100 |
| H | 0.02040600  | -1.44428100 | -2.48364000 |
| O | -0.79503000 | -2.82971700 | -1.16247300 |
| C | -1.98145100 | -2.15659100 | -0.99184100 |
| C | -2.48021900 | -2.02608300 | 0.31518600  |
| C | -2.68264500 | -1.63978900 | -2.06642500 |
| C | -3.67861200 | -1.34557900 | 0.51522500  |

|    |             |             |             |
|----|-------------|-------------|-------------|
| C  | -3.87569200 | -0.94925200 | -1.86149700 |
| C  | -4.36529000 | -0.80529800 | -0.57294900 |
| H  | -4.08047600 | -1.22565800 | 1.51268200  |
| H  | -4.41435100 | -0.53557900 | -2.70423500 |
| H  | -5.29674700 | -0.27877500 | -0.40169500 |
| H  | 1.06026200  | -2.78678500 | -1.95716600 |
| O  | -1.72312300 | -2.57095500 | 1.29489100  |
| C  | -2.18884300 | -2.44608400 | 2.62287500  |
| H  | -1.45009900 | -2.94382500 | 3.24744200  |
| H  | -2.26781800 | -1.39328000 | 2.91422600  |
| H  | -3.15934500 | -2.93606600 | 2.74826900  |
| H  | -2.28197700 | -1.77491500 | -3.06534100 |
| N  | 2.10884700  | -1.49588800 | -0.27196900 |
| O  | 2.67202300  | -0.55542700 | 0.63558800  |
| H  | 3.28301200  | -1.05014400 | 1.22471700  |
| S  | 4.18184000  | 0.61026200  | -0.28629300 |
| O  | 4.83134900  | -0.28193500 | -1.19237800 |
| Cl | 5.23961600  | -0.17238700 | 1.73416100  |
| Cl | 2.56944600  | 1.40247900  | -1.61811100 |

#### E-TS<sub>4-5</sub>

|   |             |             |             |
|---|-------------|-------------|-------------|
| C | -0.84789600 | 0.90769100  | 1.98607300  |
| C | 0.04800900  | 0.04546000  | 1.37579100  |
| C | 0.08768700  | -0.05073500 | -0.01634800 |
| C | -0.75279700 | 0.75941300  | -0.78121800 |
| C | -1.62136500 | 1.65175100  | -0.17647700 |
| C | -1.70234500 | 1.70202500  | 1.22373600  |
| H | -0.91643400 | 0.97770800  | 3.06507900  |
| H | 0.68318900  | -0.58759900 | 1.98169800  |
| H | -0.73727500 | 0.73459500  | -1.86459300 |
| C | 0.95104400  | -1.04161300 | -0.68934000 |
| O | -2.56157800 | 2.52240500  | 1.87915100  |
| C | -3.91931100 | 2.54351700  | 1.43211000  |
| H | -4.07447000 | 3.31234600  | 0.67436300  |
| H | -4.19955100 | 1.57174700  | 1.01925600  |
| H | -4.52042400 | 2.76597200  | 2.31237100  |
| O | -2.40079800 | 2.46207700  | -0.95652700 |
| C | -1.96841000 | 3.82170100  | -0.95014100 |
| H | -0.95489200 | 3.89811200  | -1.35437400 |
| H | -2.66065100 | 4.37010100  | -1.58667000 |
| H | -1.98707300 | 4.23391600  | 0.06366000  |
| C | 0.37445200  | -1.91390700 | -1.78763500 |
| H | 0.02032900  | -1.27266800 | -2.60315100 |
| O | -0.65984400 | -2.75195700 | -1.30888900 |

|    |             |             |             |
|----|-------------|-------------|-------------|
| C  | -1.87951400 | -2.16107900 | -1.07836400 |
| C  | -2.34057200 | -2.10079900 | 0.24750500  |
| C  | -2.64793700 | -1.66020000 | -2.11373900 |
| C  | -3.57233600 | -1.50406100 | 0.50629500  |
| C  | -3.87473000 | -1.05414700 | -1.84982300 |
| C  | -4.32835200 | -0.97868900 | -0.54243400 |
| H  | -3.94667700 | -1.43719300 | 1.51928100  |
| H  | -4.46777400 | -0.65359400 | -2.66174000 |
| H  | -5.28468800 | -0.51703200 | -0.32657500 |
| H  | 1.15847200  | -2.56743200 | -2.16455900 |
| O  | -1.51984700 | -2.62662600 | 1.18452200  |
| C  | -1.95011300 | -2.57487300 | 2.52948200  |
| H  | -1.16218700 | -3.04457000 | 3.11431200  |
| H  | -2.08616800 | -1.53931500 | 2.85870900  |
| H  | -2.88372100 | -3.12935500 | 2.66567900  |
| H  | -2.27417000 | -1.74302200 | -3.12859100 |
| N  | 2.18237800  | -1.30553700 | -0.45029300 |
| O  | 2.71389600  | -0.40305000 | 0.51709800  |
| H  | 3.38180700  | -0.89363600 | 1.11733200  |
| S  | 4.16371700  | 0.73969900  | -0.25855300 |
| O  | 4.77924700  | -0.03630400 | -1.28532300 |
| Cl | 5.14403200  | -0.57190400 | 1.73713700  |
| Cl | 2.61329400  | 1.81563400  | -1.35747100 |

### E-Int5

|   |             |             |             |
|---|-------------|-------------|-------------|
| C | 0.95537000  | 0.99393400  | -1.96964400 |
| C | -0.12520800 | 0.46430600  | -1.28055300 |
| C | -0.17171900 | 0.54869200  | 0.11132500  |
| C | 0.84751200  | 1.21552000  | 0.79228300  |
| C | 1.91003400  | 1.77951300  | 0.10329400  |
| C | 1.98986100  | 1.63241800  | -1.28936500 |
| H | 1.02842300  | 0.91619900  | -3.04804700 |
| H | -0.91551600 | -0.05131800 | -1.81150700 |
| H | 0.83928300  | 1.31820700  | 1.87172200  |
| C | -1.24545200 | -0.12776200 | 0.87592400  |
| O | 3.02388700  | 2.12656000  | -2.02107900 |
| C | 4.34632100  | 1.87554600  | -1.54322000 |
| H | 4.70784700  | 2.70466600  | -0.93304400 |
| H | 4.37230400  | 0.95947900  | -0.94973300 |
| H | 4.97328500  | 1.77068700  | -2.42788700 |
| O | 2.87804900  | 2.45947200  | 0.79437300  |
| C | 2.81148700  | 3.87070000  | 0.60261100  |
| H | 1.86419600  | 4.26093900  | 0.98554300  |
| H | 3.63927300  | 4.29999200  | 1.16474500  |

|    |             |             |             |
|----|-------------|-------------|-------------|
| H  | 2.90752100  | 4.12776700  | -0.45709400 |
| C  | -0.85702400 | -1.07941700 | 1.98705500  |
| H  | -0.38256300 | -0.53051300 | 2.80541200  |
| O  | 0.00832800  | -2.09672600 | 1.49266000  |
| C  | 1.34881800  | -1.80661600 | 1.43002700  |
| C  | 1.98343100  | -1.98486000 | 0.19050100  |
| C  | 2.07784300  | -1.38074500 | 2.52690100  |
| C  | 3.33608400  | -1.69156400 | 0.06281300  |
| C  | 3.43105100  | -1.07404600 | 2.39435300  |
| C  | 4.05265100  | -1.22406400 | 1.16496400  |
| H  | 3.83392500  | -1.81877100 | -0.88970200 |
| H  | 3.99091900  | -0.72629300 | 3.25304400  |
| H  | 5.10434600  | -0.98930100 | 1.05404400  |
| H  | -1.75222300 | -1.57496400 | 2.35731800  |
| O  | 1.19205500  | -2.43745000 | -0.81387800 |
| C  | 1.74010900  | -2.51429900 | -2.11789700 |
| H  | 0.91941400  | -2.81999500 | -2.76462900 |
| H  | 2.11814400  | -1.53777900 | -2.43563900 |
| H  | 2.53967600  | -3.25937600 | -2.16000300 |
| H  | 1.58410600  | -1.27925700 | 3.48660400  |
| N  | -2.50145300 | -0.04465000 | 0.69106200  |
| O  | -2.80949600 | 0.87060900  | -0.33498400 |
| H  | -0.73995500 | -2.71957600 | -0.71270200 |
| S  | -4.41122200 | 0.93485700  | -0.69514300 |
| O  | -4.93768900 | -0.40382600 | -0.80838000 |
| Cl | -1.86505800 | -2.80166600 | -1.35543400 |
| Cl | -5.07439800 | 1.69410000  | 1.18946300  |

### E-TS<sub>5-6</sub>

|   |             |             |             |
|---|-------------|-------------|-------------|
| C | -0.83287200 | 0.60284800  | 2.11271200  |
| C | 0.15559900  | 0.03815500  | 1.32659200  |
| C | 0.11341700  | 0.22792400  | -0.05471900 |
| C | -0.87152900 | 1.01819900  | -0.63863100 |
| C | -1.83658200 | 1.61057200  | 0.15435700  |
| C | -1.84803300 | 1.36955800  | 1.53975800  |
| H | -0.84365100 | 0.46170000  | 3.18649100  |
| H | 0.94051600  | -0.56380500 | 1.76534000  |
| H | -0.88821400 | 1.23948200  | -1.69884500 |
| C | 1.12420800  | -0.44237100 | -0.85290500 |
| O | -2.77620100 | 1.89354000  | 2.36985900  |
| C | -4.13980600 | 1.91439800  | 1.94164300  |
| H | -4.38152600 | 2.85247300  | 1.44145600  |
| H | -4.34126400 | 1.08318300  | 1.26324900  |
| H | -4.73557300 | 1.81454900  | 2.84748200  |



|    |             |             |             |
|----|-------------|-------------|-------------|
| O  | -2.75382700 | 2.44574700  | -0.42072600 |
| C  | -2.43037200 | 3.82465400  | -0.22113300 |
| H  | -1.45368500 | 4.05024000  | -0.65793800 |
| H  | -3.20644200 | 4.39942900  | -0.72304800 |
| H  | -2.41621900 | 4.06665000  | 0.84652300  |
| C  | 0.76346700  | -1.10223600 | -2.39468400 |
| H  | 0.28406100  | -0.19317200 | -2.77660500 |
| O  | -0.02196200 | -2.19388100 | -2.28076000 |
| C  | -1.28899100 | -2.00169500 | -1.73369900 |
| C  | -1.47455900 | -2.36636600 | -0.39382600 |
| C  | -2.30786500 | -1.46662500 | -2.49441600 |
| C  | -2.72680500 | -2.15397200 | 0.17839300  |
| C  | -3.55715000 | -1.25425000 | -1.91364000 |
| C  | -3.75356300 | -1.59745600 | -0.58426800 |
| H  | -2.90456500 | -2.41146100 | 1.21385000  |
| H  | -4.36192100 | -0.82890000 | -2.49847000 |
| H  | -4.72226600 | -1.44063900 | -0.12452900 |
| H  | 1.66564100  | -1.33768200 | -2.94871500 |
| O  | -0.39093900 | -2.85431600 | 0.23913900  |
| C  | -0.54068200 | -3.27118200 | 1.58768000  |
| H  | 0.43977200  | -3.62290200 | 1.89752600  |
| H  | -0.84543200 | -2.43379100 | 2.22233500  |
| H  | -1.27291000 | -4.08047800 | 1.66126500  |
| H  | -2.11617400 | -1.21855300 | -3.53272800 |
| N  | 2.25789200  | -0.82841400 | -0.93448400 |
| O  | 3.11086000  | 0.36159800  | 0.63443900  |
| H  | 3.30806400  | -1.07527500 | 1.68232800  |
| S  | 3.90186200  | 1.49480400  | 0.02548800  |
| O  | 4.87592900  | 1.01753300  | -0.93585700 |
| Cl | 3.07957000  | -2.08982200 | 2.47452200  |
| Cl | 2.21328600  | 2.44619200  | -1.36495800 |

### **E-Int6**

|   |             |             |             |
|---|-------------|-------------|-------------|
| C | 3.25834400  | 0.43152600  | -1.54366000 |
| C | 1.96452400  | 0.86007100  | -1.77598500 |
| C | 0.99690700  | 0.55180100  | -0.82053500 |
| C | 1.29413700  | -0.18316700 | 0.33565000  |
| C | 2.58958200  | -0.61918600 | 0.54919100  |
| C | 3.59247200  | -0.28730200 | -0.39292300 |
| H | 4.05821300  | 0.65733100  | -2.23702300 |
| H | 1.70980100  | 1.44042300  | -2.65278000 |
| H | 0.49256200  | -0.39941100 | 1.03242400  |
| C | -0.36630000 | 0.85698300  | -1.00534700 |
| O | 4.87509500  | -0.67192000 | -0.27923400 |

|    |             |             |             |
|----|-------------|-------------|-------------|
| C  | 5.51681200  | -0.64617700 | 1.00144800  |
| H  | 5.13113400  | 0.17599000  | 1.60655400  |
| H  | 5.37180100  | -1.58832200 | 1.52542000  |
| H  | 6.57226100  | -0.48561100 | 0.79059100  |
| O  | 2.94974600  | -1.37822400 | 1.60666100  |
| C  | 1.93310500  | -1.67306800 | 2.56155900  |
| H  | 1.12161700  | -2.24640700 | 2.10304100  |
| H  | 2.41773600  | -2.26452900 | 3.33399200  |
| H  | 1.52256700  | -0.75528300 | 2.99033100  |
| C  | -2.92335000 | 0.74839300  | -1.17067800 |
| H  | -3.27251000 | 0.83040500  | -0.13846400 |
| O  | -3.11448800 | -0.50318400 | -1.73577700 |
| C  | -2.68604000 | -1.55226900 | -0.92905300 |
| C  | -1.43727900 | -2.13918700 | -1.18239600 |
| C  | -3.48668300 | -2.00179000 | 0.10170100  |
| C  | -1.00341500 | -3.17084200 | -0.35256000 |
| C  | -3.05181800 | -3.03602500 | 0.92445100  |
| C  | -1.81114600 | -3.60931800 | 0.69585500  |
| H  | -0.04184800 | -3.63845300 | -0.51900000 |
| H  | -3.67307900 | -3.37316000 | 1.74352900  |
| H  | -1.45700700 | -4.40971700 | 1.33432700  |
| H  | -3.37724100 | 1.50167100  | -1.80922900 |
| O  | -0.72703900 | -1.63906000 | -2.22717200 |
| C  | 0.50105400  | -2.26817100 | -2.54759200 |
| H  | 0.87982600  | -1.75094600 | -3.42653900 |
| H  | 1.22347800  | -2.16881200 | -1.72988200 |
| H  | 0.34769400  | -3.32566300 | -2.78145600 |
| H  | -4.44287900 | -1.51814300 | 0.26534700  |
| N  | -1.49506000 | 1.02976900  | -1.09690000 |
| O  | -0.14171100 | 2.62676000  | 1.25087000  |
| H  | 0.18672600  | 3.48520500  | -0.22199400 |
| S  | -1.45976900 | 2.51169900  | 1.91504600  |
| O  | -2.56486900 | 2.74793100  | 0.98745600  |
| Cl | 0.40595200  | 4.01941000  | -1.40663800 |
| Cl | -1.60880100 | 0.06328500  | 2.13082500  |

### **E-Int7**

|   |            |             |             |
|---|------------|-------------|-------------|
| C | 2.14987600 | -1.81927900 | -1.09946200 |
| C | 0.87977100 | -1.60093900 | -1.59119300 |
| C | 0.32690300 | -0.32542900 | -1.42094300 |
| C | 1.00345000 | 0.70133700  | -0.74472400 |
| C | 2.25913900 | 0.45391500  | -0.21966500 |
| C | 2.85601500 | -0.81246300 | -0.42701500 |
| H | 2.64498600 | -2.77465200 | -1.21975500 |

|    |             |             |             |
|----|-------------|-------------|-------------|
| H  | 0.32957700  | -2.38155000 | -2.10097000 |
| H  | 0.47707600  | 1.64831100  | -0.60736900 |
| C  | -1.01063200 | -0.05259500 | -1.74192600 |
| O  | 4.06768100  | -1.15683800 | 0.03569300  |
| C  | 5.12893900  | -0.19497900 | 0.07042900  |
| H  | 5.06916700  | 0.47101300  | -0.79186500 |
| H  | 5.09460900  | 0.38921100  | 0.98699100  |
| H  | 6.04468000  | -0.78088800 | 0.02451700  |
| O  | 2.93248200  | 1.35574200  | 0.52210500  |
| C  | 2.27808100  | 2.60743100  | 0.75229800  |
| H  | 1.32161300  | 2.45773800  | 1.25968000  |
| H  | 2.95737700  | 3.18115900  | 1.37720200  |
| H  | 2.09304500  | 3.13049300  | -0.18899100 |
| C  | -3.37275800 | 0.56834400  | -1.29280900 |
| H  | -3.18695000 | 1.62792200  | -1.06744700 |
| O  | -3.55464500 | -0.23551400 | -0.17782000 |
| C  | -2.53182600 | -0.19423900 | 0.75851500  |
| C  | -1.74320200 | -1.34673500 | 0.90467900  |
| C  | -2.27554000 | 0.94223600  | 1.50322100  |
| C  | -0.70908100 | -1.34431300 | 1.83701700  |
| C  | -1.22921000 | 0.94442800  | 2.42172000  |
| C  | -0.45789000 | -0.19592000 | 2.58765600  |
| H  | -0.08310500 | -2.21650200 | 1.96760200  |
| H  | -1.01908200 | 1.84363600  | 2.98631900  |
| H  | 0.35967500  | -0.20203700 | 3.29905400  |
| H  | -4.20567200 | 0.40444000  | -1.96859400 |
| O  | -2.01993200 | -2.38022300 | 0.06601800  |
| C  | -1.38312100 | -3.61562500 | 0.33223000  |
| H  | -1.79428500 | -4.32540000 | -0.38260000 |
| H  | -0.29920000 | -3.54263900 | 0.19522000  |
| H  | -1.59885600 | -3.95386300 | 1.35002900  |
| H  | -2.86351500 | 1.83518700  | 1.33360600  |
| N  | -2.11880200 | 0.18247100  | -1.97192100 |
| Cl | -1.23104100 | 3.11498400  | -0.70572500 |

### E-TS<sub>7-8</sub>

|   |            |             |             |
|---|------------|-------------|-------------|
| C | 3.16480000 | -1.95669700 | 0.09653000  |
| C | 1.86018900 | -2.37811700 | -0.09783400 |
| C | 0.93891200 | -1.46636200 | -0.60956600 |
| C | 1.29833700 | -0.14053500 | -0.89894600 |
| C | 2.59988800 | 0.28017600  | -0.67536700 |
| C | 3.55441000 | -0.65033300 | -0.19375500 |
| H | 3.92162400 | -2.62960400 | 0.47901800  |
| H | 1.56072900 | -3.39149800 | 0.13548000  |

|    |             |             |             |
|----|-------------|-------------|-------------|
| H  | 0.54057600  | 0.54913000  | -1.24821700 |
| C  | -0.42483500 | -1.81962300 | -0.77152700 |
| O  | 4.83083200  | -0.32644800 | 0.07164600  |
| C  | 5.56000400  | 0.51293300  | -0.83279900 |
| H  | 5.24306400  | 0.33210800  | -1.86171900 |
| H  | 5.42205300  | 1.56244100  | -0.58327900 |
| H  | 6.60279300  | 0.22671300  | -0.71299700 |
| O  | 3.02476100  | 1.54783400  | -0.85221400 |
| C  | 2.09616800  | 2.49205300  | -1.37209300 |
| H  | 1.23585900  | 2.59931500  | -0.70643000 |
| H  | 2.63547800  | 3.43367500  | -1.43315300 |
| H  | 1.76155000  | 2.19459100  | -2.36988300 |
| C  | -3.07908400 | -1.43423800 | -0.50731400 |
| H  | -3.21529000 | -0.76040300 | -1.34857400 |
| O  | -2.91219200 | -0.91376400 | 0.70536700  |
| C  | -2.26857800 | 0.31721200  | 0.76404600  |
| C  | -1.06639000 | 0.37314700  | 1.48483500  |
| C  | -2.82008800 | 1.43691800  | 0.16843900  |
| C  | -0.42035600 | 1.60229700  | 1.60347700  |
| C  | -2.15787800 | 2.65862900  | 0.28816400  |
| C  | -0.97441500 | 2.73669600  | 1.00764300  |
| H  | 0.50429000  | 1.68564400  | 2.15925500  |
| H  | -2.58844800 | 3.54378700  | -0.16224600 |
| H  | -0.47084900 | 3.68992700  | 1.12388800  |
| H  | -3.71703300 | -2.30633800 | -0.50881100 |
| O  | -0.60797800 | -0.79640800 | 1.99713400  |
| C  | 0.61143700  | -0.75690200 | 2.71431600  |
| H  | 0.80641600  | -1.77964100 | 3.03000400  |
| H  | 1.43270000  | -0.40867200 | 2.07722400  |
| H  | 0.52878200  | -0.11296500 | 3.59462500  |
| H  | -3.76799800 | 1.32674800  | -0.35995200 |
| N  | -1.54398800 | -2.05556200 | -0.90734400 |
| Cl | -5.47922900 | -0.13525000 | -1.37281000 |

### **E-Int8**

|   |             |             |             |
|---|-------------|-------------|-------------|
| C | -1.98380500 | -2.20875400 | -0.57425700 |
| C | -0.84521100 | -2.50790200 | 0.15968800  |
| C | -0.41561400 | -1.61125300 | 1.13224600  |
| C | -1.09851400 | -0.41215200 | 1.36140800  |
| C | -2.22136600 | -0.10754800 | 0.60514200  |
| C | -2.67998700 | -1.02815600 | -0.35888000 |
| H | -2.35407100 | -2.88104200 | -1.33802500 |
| H | -0.29533700 | -3.42252300 | -0.01780600 |
| H | -0.70747100 | 0.28719800  | 2.08900500  |

|    |             |             |             |
|----|-------------|-------------|-------------|
| C  | 0.77201300  | -1.88243200 | 1.88904600  |
| O  | -3.74563900 | -0.76371600 | -1.15874500 |
| C  | -4.97355500 | -0.38705700 | -0.53312400 |
| H  | -5.07613000 | -0.87976400 | 0.43705900  |
| H  | -5.02764900 | 0.69248200  | -0.40138200 |
| H  | -5.76572700 | -0.72647100 | -1.19870700 |
| O  | -2.90497200 | 1.06109300  | 0.69127200  |
| C  | -2.57609200 | 1.93608600  | 1.75903300  |
| H  | -1.55331800 | 2.30836600  | 1.66118100  |
| H  | -3.27597500 | 2.76587900  | 1.68946800  |
| H  | -2.69874400 | 1.43132400  | 2.72203600  |
| C  | 3.29432700  | -1.22868200 | -0.16112900 |
| H  | 3.41929100  | -1.13159600 | 0.91479400  |
| O  | 2.10417100  | -0.70233200 | -0.62023300 |
| C  | 1.73717900  | 0.55561500  | -0.22510500 |
| C  | 0.59309200  | 1.07124800  | -0.87028000 |
| C  | 2.38578800  | 1.30151900  | 0.74319100  |
| C  | 0.14275900  | 2.34267100  | -0.53883300 |
| C  | 1.91308800  | 2.57267600  | 1.08227500  |
| C  | 0.80511600  | 3.09155000  | 0.43868000  |
| H  | -0.72562900 | 2.75638000  | -1.03414800 |
| H  | 2.43462800  | 3.14942400  | 1.83540600  |
| H  | 0.44686100  | 4.08532500  | 0.68029700  |
| H  | 3.31452100  | -2.26930800 | -0.46626700 |
| O  | 0.00431200  | 0.25276600  | -1.76722900 |
| C  | -1.09572400 | 0.76494300  | -2.49684800 |
| H  | -1.44019400 | -0.05111800 | -3.12847100 |
| H  | -1.91112300 | 1.06956000  | -1.83401800 |
| H  | -0.78657500 | 1.61166600  | -3.11828100 |
| H  | 3.27331800  | 0.91890100  | 1.22886700  |
| N  | 1.73040900  | -2.08912700 | 2.49292900  |
| Cl | 4.73132500  | -0.43809000 | -0.92973800 |
